# Supplementary material for: Young honey bees avoid consuming the pollen they recognize as pesticide-contaminated
Source: Research Square preprint supplement (doi:10.21203/rs.3.rs-7859079/v1), 2025-10-31
Supplement: Supplementary file 1 [file 7955fd2044fc7244bd34396f.xlsx]

## Sheet: GLY_experiment (Fig. 3 & 4)
Bee cage	Concentration (ug/l)	Exp. phase	SC	Total pollen consumption (mg)	Initial preferece (SCi)	Series
1	0	training	0.545455	2.2	0.8	B-D
1	0	testing	0.5	1.6	0.8	B-D
2	0	training	0.5	1.6	0.4	B-D
2	0	testing	0.571429	1.4	0.4	B-D
4	10	training	0.375	1.6	0.4	B-D
4	10	testing	0.25	0.8	0.4	B-D
5	10	training	0.125	1.6	0.5	B-D
5	10	testing	0.5	1.2	0.5	B-D
6	10	training	0.375	1.6	0.428571	B-D
6	10	testing	0.5	0.8	0.428571	B-D
7	1	training	0.666667	1.2	0.333333	B-D
7	1	testing	0.428571	1.4	0.333333	B-D
8	1	training	0.75	0.8	0.5	B-D
8	1	testing	0.2	1	0.5	B-D
9	1	training	0.5	0.8	0.4	B-D
9	1	testing	0.285714	1.4	0.4	B-D
10	0	training	0.6	2	0.6	B-D
10	0	testing	0.571429	1.4	0.6	B-D
11	0	training	0.444444	1.8	0.375	B-D
11	0	testing	0.571429	1.4	0.375	B-D
12	0	training	0.625	1.6	0.625	B-D
12	0	testing	0.625	1.6	0.625	B-D
13	0	training	0.6	2	0.571429	B-D
13	0	testing	0.5	1.6	0.571429	B-D
14	10	training	0.285714	1.4	0.6	B-D
14	10	testing	0.6	1	0.6	B-D
15	10	training	0.454545	2.2	0.4	B-D
15	10	testing	0.333333	0.6	0.4	B-D
16	10	training	0.333333	1.2	0.6	B-D
16	10	testing	0.666667	0.6	0.6	B-D
17	1	training	0.5	1.6	0.571429	B-D
17	1	testing	0.5	0.8	0.571429	B-D
18	1	training	0.625	1.6	0.666667	B-D
18	1	testing	0.666667	1.2	0.666667	B-D
19	1	training	0.6	1	0.666667	B-D
19	1	testing	0.6	1	0.666667	B-D
42	0	training	0.5	1.6	0.5	S-D
42	0	testing	0.6	1.6	0.5	S-D
43	0	training	0.571429	1.4	0.75	S-D
43	0	testing	0.5	1.2	0.75	S-D
44	10	training	0.444444	1.8	0.75	S-D
44	10	testing	0.428571	1.4	0.75	S-D
45	10	training	0.5	2	0.666667	S-D
45	10	testing	0.428571	1.4	0.666667	S-D
46	10	training	0.333333	2.4	0.666667	S-D
46	10	testing	0.4	1	0.666667	S-D
47	10	training	0.5	2	0.4	S-D
47	10	testing	0.666667	1.2	0.4	S-D
48	1	training	0.4	2	0.714286	S-D
48	1	testing	0.5	1.2	0.714286	S-D
49	1	training	0.4	2	0.666667	S-D
49	1	testing	0.5	1.6	0.666667	S-D
50	1	training	0.444444	1.8	0.625	S-D
50	1	testing	0.571429	1.4	0.625	S-D
52	0	training	0.6	1	0.714286	S-D
52	0	testing	0.4	1	0.714286	S-D
53	0	training	0.6	1	0.428571	S-D
53	0	testing	0.428571	1.4	0.428571	S-D
54	10	training	0.5	0.8	0.428571	S-D
54	10	testing	0.5	1.2	0.428571	S-D
55	10	training	0.333333	1.2	0.5	S-D
55	10	testing	0.6	1	0.5	S-D
56	1	training	0.6	1	0.4	S-D
56	1	testing	0.5	0.8	0.4	S-D
57	1	training	0.4	1	0.4	S-D
57	1	testing	0.5	1.2	0.4	S-D
58	1	training	0.5	1.2	0.428571	S-D
58	1	testing	0.5	1.2	0.428571	S-D
59	0	training	0.5	1.2	0.5	S-D
59	0	testing	0.4	1	0.5	S-D
60	0	training	1	0.6	0.4	S-D
60	0	testing	0.5	1.2	0.4	S-D

## Sheet: IMI_experiment (Fig. 5, 6 & S1)
Bee cage	Concentration (mg/l)	Exp. phase	SC	Total pollen consumption (mg)	Initial preferece (SCi)	Series
21	0	training	0.6	1	0.5	B-D
21	0	testing	0.571429	1.4	0.5	B-D
22	0	training	0.625	1.6	0.666667	B-D
22	0	testing	0.4	1	0.666667	B-D
23	0	training	0.833333	1.2	0.333333	B-D
23	0	testing	0.75	0.8	0.333333	B-D
24	2.5	training	0.571429	1.4	0.666667	B-D
24	2.5	testing	0.2	1	0.666667	B-D
25	2.5	training	0.6	1	0.666667	B-D
25	2.5	testing	0.6	1	0.666667	B-D
26	2.5	training	0.7	2	0.666667	B-D
26	2.5	testing	0.6	1	0.666667	B-D
27	1.25	training	0.75	1.6	0.5	B-D
27	1.25	testing	0.5	0.4	0.5	B-D
28	1.25	training	0.714286	1.4	0.666667	B-D
28	1.25	testing	0.666667	0.6	0.666667	B-D
30	0	training	0.545455	2.2	0.666667	B-D
30	0	testing	0.5	0.4	0.666667	B-D
31	0	training	0.545455	2.2	0.333333	B-D
31	0	testing	0.666667	0.6	0.333333	B-D
32	0	training	0.615385	2.6	0.666667	B-D
32	0	testing	0.666667	0.6	0.666667	B-D
33	0	training	0.4	2	0.4	B-D
33	0	testing	0.5	0.4	0.4	B-D
34	2.5	training	0.75	1.6	0.5	B-D
34	2.5	testing	0.333333	1.2	0.5	B-D
35	2.5	training	0.5	1.2	0.333333	B-D
35	2.5	testing	0.5	1.2	0.333333	B-D
36	2.5	training	0.571429	1.4	0.6	B-D
36	2.5	testing	0.5	1.2	0.6	B-D
37	1.25	training	0.444444	1.8	0.5	B-D
37	1.25	testing	0.4	1	0.5	B-D
38	1.25	training	0.428571	1.4	0.555556	B-D
38	1.25	testing	0.4	1	0.555556	B-D
39	1.25	training	0.5	1.6	0.5	B-D
39	1.25	testing	0.25	0.8	0.5	B-D
40	1.25	training	0.444444	1.8	0.4	B-D
40	1.25	testing	0.4	1	0.4	B-D
41	1.25	training	0.5	1.6	0.75	B-D
41	1.25	testing	0.571429	1.4	0.75	B-D
61	0	training	0.428571	1.4	0.5	S-D
61	0	testing	0.571429	1.4	0.5	S-D
62	0	training	0.666667	1.2	0.4	S-D
62	0	testing	0.4	1	0.4	S-D
63	2.5	training	0.385714	1.4	0.5	S-D
63	2.5	testing	0.4	1	0.5	S-D
64	2.5	training	0.3	2	0.5	S-D
64	2.5	testing	0.307692	1.3	0.5	S-D
65	2.5	training	0.333333	1.2	0.555556	S-D
65	2.5	testing	0.4	1	0.555556	S-D
66	1.25	training	0.625	1.6	0.5	S-D
66	1.25	testing	0.4	1	0.5	S-D
67	1.25	training	0.55	1.6	0.5	S-D
67	1.25	testing	0.4	1	0.5	S-D
68	1.25	training	0.625	1.6	0.5	S-D
68	1.25	testing	0.25	0.8	0.5	S-D
69	1.25	training	0.666667	1.2	0.625	S-D
69	1.25	testing	0.333333	0.6	0.625	S-D
70	0	training	0.666667	1.2	0.428571	S-D
70	0	testing	0.571429	1.4	0.428571	S-D
71	0	training	0.333333	0.6	0.5	S-D
71	0	testing	0.428571	1.4	0.5	S-D
72	2.5	training	0.5	0.8	0.4	S-D
72	2.5	testing	0.333333	0.6	0.4	S-D
73	2.5	training	0.285714	1.4	0.285714	S-D
73	2.5	testing	0.333333	1.2	0.285714	S-D
74	1.25	training	0.75	0.8	0.428571	S-D
74	1.25	testing	0.4	1	0.428571	S-D

## Sheet: GLY_survival (Fig. 1)
Bee cage	Bee	Total bees in cage	Concentration (mg/l)	Time (days)	Status	Series
1	1	70	0	1	1	B-D
1	2	70	0	1	1	B-D
1	3	70	0	2	1	B-D
1	4	70	0	4	1	B-D
1	5	70	0	4	1	B-D
1	6	70	0	4	1	B-D
1	7	70	0	4	1	B-D
1	8	70	0	4	1	B-D
1	9	70	0	4	1	B-D
1	10	70	0	4	1	B-D
1	11	70	0	4	1	B-D
1	12	70	0	4	1	B-D
1	13	70	0	4	1	B-D
1	14	70	0	4	1	B-D
1	15	70	0	6	1	B-D
1	16	70	0	6	1	B-D
1	17	70	0	8	0	B-D
1	18	70	0	8	0	B-D
1	19	70	0	8	0	B-D
1	20	70	0	8	0	B-D
1	21	70	0	8	0	B-D
1	22	70	0	8	0	B-D
1	23	70	0	8	0	B-D
1	24	70	0	8	0	B-D
1	25	70	0	8	0	B-D
1	26	70	0	8	0	B-D
1	27	70	0	8	0	B-D
1	28	70	0	8	0	B-D
1	29	70	0	8	0	B-D
1	30	70	0	8	0	B-D
1	31	70	0	8	0	B-D
1	32	70	0	8	0	B-D
1	33	70	0	8	0	B-D
1	34	70	0	8	0	B-D
1	35	70	0	8	0	B-D
1	36	70	0	8	0	B-D
1	37	70	0	8	0	B-D
1	38	70	0	8	0	B-D
1	39	70	0	8	0	B-D
1	40	70	0	8	0	B-D
1	41	70	0	8	0	B-D
1	42	70	0	8	0	B-D
1	43	70	0	8	0	B-D
1	44	70	0	8	0	B-D
1	45	70	0	8	0	B-D
1	46	70	0	8	0	B-D
1	47	70	0	8	0	B-D
1	48	70	0	8	0	B-D
1	49	70	0	8	0	B-D
1	50	70	0	8	0	B-D
1	51	70	0	8	0	B-D
1	52	70	0	8	0	B-D
1	53	70	0	8	0	B-D
1	54	70	0	8	0	B-D
1	55	70	0	8	0	B-D
1	56	70	0	8	0	B-D
1	57	70	0	8	0	B-D
1	58	70	0	8	0	B-D
1	59	70	0	8	0	B-D
1	60	70	0	8	0	B-D
1	61	70	0	8	0	B-D
1	62	70	0	8	0	B-D
1	63	70	0	8	0	B-D
1	64	70	0	8	0	B-D
1	65	70	0	8	0	B-D
1	66	70	0	8	0	B-D
1	67	70	0	8	0	B-D
1	68	70	0	8	0	B-D
1	69	70	0	8	0	B-D
1	70	70	0	8	0	B-D
2	71	63	0	1	1	B-D
2	72	63	0	2	1	B-D
2	73	63	0	2	1	B-D
2	74	63	0	3	1	B-D
2	75	63	0	4	1	B-D
2	76	63	0	4	1	B-D
2	77	63	0	4	1	B-D
2	78	63	0	4	1	B-D
2	79	63	0	4	1	B-D
2	80	63	0	4	1	B-D
2	81	63	0	4	1	B-D
2	82	63	0	4	1	B-D
2	83	63	0	5	1	B-D
2	84	63	0	6	1	B-D
2	85	63	0	6	1	B-D
2	86	63	0	6	1	B-D
2	87	63	0	6	1	B-D
2	88	63	0	6	1	B-D
2	89	63	0	6	1	B-D
2	90	63	0	6	1	B-D
2	91	63	0	6	1	B-D
2	92	63	0	7	1	B-D
2	93	63	0	8	0	B-D
2	94	63	0	8	0	B-D
2	95	63	0	8	0	B-D
2	96	63	0	8	0	B-D
2	97	63	0	8	0	B-D
2	98	63	0	8	0	B-D
2	99	63	0	8	0	B-D
2	100	63	0	8	0	B-D
2	101	63	0	8	0	B-D
2	102	63	0	8	0	B-D
2	103	63	0	8	0	B-D
2	104	63	0	8	0	B-D
2	105	63	0	8	0	B-D
2	106	63	0	8	0	B-D
2	107	63	0	8	0	B-D
2	108	63	0	8	0	B-D
2	109	63	0	8	0	B-D
2	110	63	0	8	0	B-D
2	111	63	0	8	0	B-D
2	112	63	0	8	0	B-D
2	113	63	0	8	0	B-D
2	114	63	0	8	0	B-D
2	115	63	0	8	0	B-D
2	116	63	0	8	0	B-D
2	117	63	0	8	0	B-D
2	118	63	0	8	0	B-D
2	119	63	0	8	0	B-D
2	120	63	0	8	0	B-D
2	121	63	0	8	0	B-D
2	122	63	0	8	0	B-D
2	123	63	0	8	0	B-D
2	124	63	0	8	0	B-D
2	125	63	0	8	0	B-D
2	126	63	0	8	0	B-D
2	127	63	0	8	0	B-D
2	128	63	0	8	0	B-D
2	129	63	0	8	0	B-D
2	130	63	0	8	0	B-D
2	131	63	0	8	0	B-D
2	132	63	0	8	0	B-D
2	133	63	0	8	0	B-D
4	134	82	2.5	1	1	B-D
4	135	82	2.5	1	1	B-D
4	136	82	2.5	1	1	B-D
4	137	82	2.5	4	1	B-D
4	138	82	2.5	4	1	B-D
4	139	82	2.5	5	1	B-D
4	140	82	2.5	7	1	B-D
4	141	82	2.5	7	1	B-D
4	142	82	2.5	7	1	B-D
4	143	82	2.5	7	1	B-D
4	144	82	2.5	7	1	B-D
4	145	82	2.5	7	1	B-D
4	146	82	2.5	7	1	B-D
4	147	82	2.5	7	1	B-D
4	148	82	2.5	7	1	B-D
4	149	82	2.5	7	1	B-D
4	150	82	2.5	7	1	B-D
4	151	82	2.5	7	1	B-D
4	152	82	2.5	7	1	B-D
4	153	82	2.5	7	1	B-D
4	154	82	2.5	7	1	B-D
4	155	82	2.5	7	1	B-D
4	156	82	2.5	8	0	B-D
4	157	82	2.5	8	0	B-D
4	158	82	2.5	8	0	B-D
4	159	82	2.5	8	0	B-D
4	160	82	2.5	8	0	B-D
4	161	82	2.5	8	0	B-D
4	162	82	2.5	8	0	B-D
4	163	82	2.5	8	0	B-D
4	164	82	2.5	8	0	B-D
4	165	82	2.5	8	0	B-D
4	166	82	2.5	8	0	B-D
4	167	82	2.5	8	0	B-D
4	168	82	2.5	8	0	B-D
4	169	82	2.5	8	0	B-D
4	170	82	2.5	8	0	B-D
4	171	82	2.5	8	0	B-D
4	172	82	2.5	8	0	B-D
4	173	82	2.5	8	0	B-D
4	174	82	2.5	8	0	B-D
4	175	82	2.5	8	0	B-D
4	176	82	2.5	8	0	B-D
4	177	82	2.5	8	0	B-D
4	178	82	2.5	8	0	B-D
4	179	82	2.5	8	0	B-D
4	180	82	2.5	8	0	B-D
4	181	82	2.5	8	0	B-D
4	182	82	2.5	8	0	B-D
4	183	82	2.5	8	0	B-D
4	184	82	2.5	8	0	B-D
4	185	82	2.5	8	0	B-D
4	186	82	2.5	8	0	B-D
4	187	82	2.5	8	0	B-D
4	188	82	2.5	8	0	B-D
4	189	82	2.5	8	0	B-D
4	190	82	2.5	8	0	B-D
4	191	82	2.5	8	0	B-D
4	192	82	2.5	8	0	B-D
4	193	82	2.5	8	0	B-D
4	194	82	2.5	8	0	B-D
4	195	82	2.5	8	0	B-D
4	196	82	2.5	8	0	B-D
4	197	82	2.5	8	0	B-D
4	198	82	2.5	8	0	B-D
4	199	82	2.5	8	0	B-D
4	200	82	2.5	8	0	B-D
4	201	82	2.5	8	0	B-D
4	202	82	2.5	8	0	B-D
4	203	82	2.5	8	0	B-D
4	204	82	2.5	8	0	B-D
4	205	82	2.5	8	0	B-D
4	206	82	2.5	8	0	B-D
4	207	82	2.5	8	0	B-D
4	208	82	2.5	8	0	B-D
4	209	82	2.5	8	0	B-D
4	210	82	2.5	8	0	B-D
4	211	82	2.5	8	0	B-D
4	212	82	2.5	8	0	B-D
4	213	82	2.5	8	0	B-D
4	214	82	2.5	8	0	B-D
4	215	82	2.5	8	0	B-D
5	216	69	2.5	1	1	B-D
5	217	69	2.5	3	1	B-D
5	218	69	2.5	6	1	B-D
5	219	69	2.5	7	1	B-D
5	220	69	2.5	8	0	B-D
5	221	69	2.5	8	0	B-D
5	222	69	2.5	8	0	B-D
5	223	69	2.5	8	0	B-D
5	224	69	2.5	8	0	B-D
5	225	69	2.5	8	0	B-D
5	226	69	2.5	8	0	B-D
5	227	69	2.5	8	0	B-D
5	228	69	2.5	8	0	B-D
5	229	69	2.5	8	0	B-D
5	230	69	2.5	8	0	B-D
5	231	69	2.5	8	0	B-D
5	232	69	2.5	8	0	B-D
5	233	69	2.5	8	0	B-D
5	234	69	2.5	8	0	B-D
5	235	69	2.5	8	0	B-D
5	236	69	2.5	8	0	B-D
5	237	69	2.5	8	0	B-D
5	238	69	2.5	8	0	B-D
5	239	69	2.5	8	0	B-D
5	240	69	2.5	8	0	B-D
5	241	69	2.5	8	0	B-D
5	242	69	2.5	8	0	B-D
5	243	69	2.5	8	0	B-D
5	244	69	2.5	8	0	B-D
5	245	69	2.5	8	0	B-D
5	246	69	2.5	8	0	B-D
5	247	69	2.5	8	0	B-D
5	248	69	2.5	8	0	B-D
5	249	69	2.5	8	0	B-D
5	250	69	2.5	8	0	B-D
5	251	69	2.5	8	0	B-D
5	252	69	2.5	8	0	B-D
5	253	69	2.5	8	0	B-D
5	254	69	2.5	8	0	B-D
5	255	69	2.5	8	0	B-D
5	256	69	2.5	8	0	B-D
5	257	69	2.5	8	0	B-D
5	258	69	2.5	8	0	B-D
5	259	69	2.5	8	0	B-D
5	260	69	2.5	8	0	B-D
5	261	69	2.5	8	0	B-D
5	262	69	2.5	8	0	B-D
5	263	69	2.5	8	0	B-D
5	264	69	2.5	8	0	B-D
5	265	69	2.5	8	0	B-D
5	266	69	2.5	8	0	B-D
5	267	69	2.5	8	0	B-D
5	268	69	2.5	8	0	B-D
5	269	69	2.5	8	0	B-D
5	270	69	2.5	8	0	B-D
5	271	69	2.5	8	0	B-D
5	272	69	2.5	8	0	B-D
5	273	69	2.5	8	0	B-D
5	274	69	2.5	8	0	B-D
5	275	69	2.5	8	0	B-D
5	276	69	2.5	8	0	B-D
5	277	69	2.5	8	0	B-D
5	278	69	2.5	8	0	B-D
5	279	69	2.5	8	0	B-D
5	280	69	2.5	8	0	B-D
5	281	69	2.5	8	0	B-D
5	282	69	2.5	8	0	B-D
5	283	69	2.5	8	0	B-D
5	284	69	2.5	8	0	B-D
6	285	71	2.5	2	1	B-D
6	286	71	2.5	6	1	B-D
6	287	71	2.5	8	0	B-D
6	288	71	2.5	8	0	B-D
6	289	71	2.5	8	0	B-D
6	290	71	2.5	8	0	B-D
6	291	71	2.5	8	0	B-D
6	292	71	2.5	8	0	B-D
6	293	71	2.5	8	0	B-D
6	294	71	2.5	8	0	B-D
6	295	71	2.5	8	0	B-D
6	296	71	2.5	8	0	B-D
6	297	71	2.5	8	0	B-D
6	298	71	2.5	8	0	B-D
6	299	71	2.5	8	0	B-D
6	300	71	2.5	8	0	B-D
6	301	71	2.5	8	0	B-D
6	302	71	2.5	8	0	B-D
6	303	71	2.5	8	0	B-D
6	304	71	2.5	8	0	B-D
6	305	71	2.5	8	0	B-D
6	306	71	2.5	8	0	B-D
6	307	71	2.5	8	0	B-D
6	308	71	2.5	8	0	B-D
6	309	71	2.5	8	0	B-D
6	310	71	2.5	8	0	B-D
6	311	71	2.5	8	0	B-D
6	312	71	2.5	8	0	B-D
6	313	71	2.5	8	0	B-D
6	314	71	2.5	8	0	B-D
6	315	71	2.5	8	0	B-D
6	316	71	2.5	8	0	B-D
6	317	71	2.5	8	0	B-D
6	318	71	2.5	8	0	B-D
6	319	71	2.5	8	0	B-D
6	320	71	2.5	8	0	B-D
6	321	71	2.5	8	0	B-D
6	322	71	2.5	8	0	B-D
6	323	71	2.5	8	0	B-D
6	324	71	2.5	8	0	B-D
6	325	71	2.5	8	0	B-D
6	326	71	2.5	8	0	B-D
6	327	71	2.5	8	0	B-D
6	328	71	2.5	8	0	B-D
6	329	71	2.5	8	0	B-D
6	330	71	2.5	8	0	B-D
6	331	71	2.5	8	0	B-D
6	332	71	2.5	8	0	B-D
6	333	71	2.5	8	0	B-D
6	334	71	2.5	8	0	B-D
6	335	71	2.5	8	0	B-D
6	336	71	2.5	8	0	B-D
6	337	71	2.5	8	0	B-D
6	338	71	2.5	8	0	B-D
6	339	71	2.5	8	0	B-D
6	340	71	2.5	8	0	B-D
6	341	71	2.5	8	0	B-D
6	342	71	2.5	8	0	B-D
6	343	71	2.5	8	0	B-D
6	344	71	2.5	8	0	B-D
6	345	71	2.5	8	0	B-D
6	346	71	2.5	8	0	B-D
6	347	71	2.5	8	0	B-D
6	348	71	2.5	8	0	B-D
6	349	71	2.5	8	0	B-D
6	350	71	2.5	8	0	B-D
6	351	71	2.5	8	0	B-D
6	352	71	2.5	8	0	B-D
6	353	71	2.5	8	0	B-D
6	354	71	2.5	8	0	B-D
6	355	71	2.5	8	0	B-D
7	356	73	1.25	1	1	B-D
7	357	73	1.25	7	1	B-D
7	358	73	1.25	7	1	B-D
7	359	73	1.25	7	1	B-D
7	360	73	1.25	7	1	B-D
7	361	73	1.25	8	0	B-D
7	362	73	1.25	8	0	B-D
7	363	73	1.25	8	0	B-D
7	364	73	1.25	8	0	B-D
7	365	73	1.25	8	0	B-D
7	366	73	1.25	8	0	B-D
7	367	73	1.25	8	0	B-D
7	368	73	1.25	8	0	B-D
7	369	73	1.25	8	0	B-D
7	370	73	1.25	8	0	B-D
7	371	73	1.25	8	0	B-D
7	372	73	1.25	8	0	B-D
7	373	73	1.25	8	0	B-D
7	374	73	1.25	8	0	B-D
7	375	73	1.25	8	0	B-D
7	376	73	1.25	8	0	B-D
7	377	73	1.25	8	0	B-D
7	378	73	1.25	8	0	B-D
7	379	73	1.25	8	0	B-D
7	380	73	1.25	8	0	B-D
7	381	73	1.25	8	0	B-D
7	382	73	1.25	8	0	B-D
7	383	73	1.25	8	0	B-D
7	384	73	1.25	8	0	B-D
7	385	73	1.25	8	0	B-D
7	386	73	1.25	8	0	B-D
7	387	73	1.25	8	0	B-D
7	388	73	1.25	8	0	B-D
7	389	73	1.25	8	0	B-D
7	390	73	1.25	8	0	B-D
7	391	73	1.25	8	0	B-D
7	392	73	1.25	8	0	B-D
7	393	73	1.25	8	0	B-D
7	394	73	1.25	8	0	B-D
7	395	73	1.25	8	0	B-D
7	396	73	1.25	8	0	B-D
7	397	73	1.25	8	0	B-D
7	398	73	1.25	8	0	B-D
7	399	73	1.25	8	0	B-D
7	400	73	1.25	8	0	B-D
7	401	73	1.25	8	0	B-D
7	402	73	1.25	8	0	B-D
7	403	73	1.25	8	0	B-D
7	404	73	1.25	8	0	B-D
7	405	73	1.25	8	0	B-D
7	406	73	1.25	8	0	B-D
7	407	73	1.25	8	0	B-D
7	408	73	1.25	8	0	B-D
7	409	73	1.25	8	0	B-D
7	410	73	1.25	8	0	B-D
7	411	73	1.25	8	0	B-D
7	412	73	1.25	8	0	B-D
7	413	73	1.25	8	0	B-D
7	414	73	1.25	8	0	B-D
7	415	73	1.25	8	0	B-D
7	416	73	1.25	8	0	B-D
7	417	73	1.25	8	0	B-D
7	418	73	1.25	8	0	B-D
7	419	73	1.25	8	0	B-D
7	420	73	1.25	8	0	B-D
7	421	73	1.25	8	0	B-D
7	422	73	1.25	8	0	B-D
7	423	73	1.25	8	0	B-D
7	424	73	1.25	8	0	B-D
7	425	73	1.25	8	0	B-D
7	426	73	1.25	8	0	B-D
7	427	73	1.25	8	0	B-D
7	428	73	1.25	8	0	B-D
8	429	75	1.25	1	1	B-D
8	430	75	1.25	1	1	B-D
8	431	75	1.25	2	1	B-D
8	432	75	1.25	6	1	B-D
8	433	75	1.25	7	1	B-D
8	434	75	1.25	7	1	B-D
8	435	75	1.25	7	1	B-D
8	436	75	1.25	7	1	B-D
8	437	75	1.25	7	1	B-D
8	438	75	1.25	7	1	B-D
8	439	75	1.25	7	1	B-D
8	440	75	1.25	7	1	B-D
8	441	75	1.25	7	1	B-D
8	442	75	1.25	7	1	B-D
8	443	75	1.25	7	1	B-D
8	444	75	1.25	7	1	B-D
8	445	75	1.25	7	1	B-D
8	446	75	1.25	8	0	B-D
8	447	75	1.25	8	0	B-D
8	448	75	1.25	8	0	B-D
8	449	75	1.25	8	0	B-D
8	450	75	1.25	8	0	B-D
8	451	75	1.25	8	0	B-D
8	452	75	1.25	8	0	B-D
8	453	75	1.25	8	0	B-D
8	454	75	1.25	8	0	B-D
8	455	75	1.25	8	0	B-D
8	456	75	1.25	8	0	B-D
8	457	75	1.25	8	0	B-D
8	458	75	1.25	8	0	B-D
8	459	75	1.25	8	0	B-D
8	460	75	1.25	8	0	B-D
8	461	75	1.25	8	0	B-D
8	462	75	1.25	8	0	B-D
8	463	75	1.25	8	0	B-D
8	464	75	1.25	8	0	B-D
8	465	75	1.25	8	0	B-D
8	466	75	1.25	8	0	B-D
8	467	75	1.25	8	0	B-D
8	468	75	1.25	8	0	B-D
8	469	75	1.25	8	0	B-D
8	470	75	1.25	8	0	B-D
8	471	75	1.25	8	0	B-D
8	472	75	1.25	8	0	B-D
8	473	75	1.25	8	0	B-D
8	474	75	1.25	8	0	B-D
8	475	75	1.25	8	0	B-D
8	476	75	1.25	8	0	B-D
8	477	75	1.25	8	0	B-D
8	478	75	1.25	8	0	B-D
8	479	75	1.25	8	0	B-D
8	480	75	1.25	8	0	B-D
8	481	75	1.25	8	0	B-D
8	482	75	1.25	8	0	B-D
8	483	75	1.25	8	0	B-D
8	484	75	1.25	8	0	B-D
8	485	75	1.25	8	0	B-D
8	486	75	1.25	8	0	B-D
8	487	75	1.25	8	0	B-D
8	488	75	1.25	8	0	B-D
8	489	75	1.25	8	0	B-D
8	490	75	1.25	8	0	B-D
8	491	75	1.25	8	0	B-D
8	492	75	1.25	8	0	B-D
8	493	75	1.25	8	0	B-D
8	494	75	1.25	8	0	B-D
8	495	75	1.25	8	0	B-D
8	496	75	1.25	8	0	B-D
8	497	75	1.25	8	0	B-D
8	498	75	1.25	8	0	B-D
8	499	75	1.25	8	0	B-D
8	500	75	1.25	8	0	B-D
8	501	75	1.25	8	0	B-D
8	502	75	1.25	8	0	B-D
8	503	75	1.25	8	0	B-D
9	504	81	1.25	1	1	B-D
9	505	81	1.25	1	1	B-D
9	506	81	1.25	5	1	B-D
9	507	81	1.25	7	1	B-D
9	508	81	1.25	8	0	B-D
9	509	81	1.25	8	0	B-D
9	510	81	1.25	8	0	B-D
9	511	81	1.25	8	0	B-D
9	512	81	1.25	8	0	B-D
9	513	81	1.25	8	0	B-D
9	514	81	1.25	8	0	B-D
9	515	81	1.25	8	0	B-D
9	516	81	1.25	8	0	B-D
9	517	81	1.25	8	0	B-D
9	518	81	1.25	8	0	B-D
9	519	81	1.25	8	0	B-D
9	520	81	1.25	8	0	B-D
9	521	81	1.25	8	0	B-D
9	522	81	1.25	8	0	B-D
9	523	81	1.25	8	0	B-D
9	524	81	1.25	8	0	B-D
9	525	81	1.25	8	0	B-D
9	526	81	1.25	8	0	B-D
9	527	81	1.25	8	0	B-D
9	528	81	1.25	8	0	B-D
9	529	81	1.25	8	0	B-D
9	530	81	1.25	8	0	B-D
9	531	81	1.25	8	0	B-D
9	532	81	1.25	8	0	B-D
9	533	81	1.25	8	0	B-D
9	534	81	1.25	8	0	B-D
9	535	81	1.25	8	0	B-D
9	536	81	1.25	8	0	B-D
9	537	81	1.25	8	0	B-D
9	538	81	1.25	8	0	B-D
9	539	81	1.25	8	0	B-D
9	540	81	1.25	8	0	B-D
9	541	81	1.25	8	0	B-D
9	542	81	1.25	8	0	B-D
9	543	81	1.25	8	0	B-D
9	544	81	1.25	8	0	B-D
9	545	81	1.25	8	0	B-D
9	546	81	1.25	8	0	B-D
9	547	81	1.25	8	0	B-D
9	548	81	1.25	8	0	B-D
9	549	81	1.25	8	0	B-D
9	550	81	1.25	8	0	B-D
9	551	81	1.25	8	0	B-D
9	552	81	1.25	8	0	B-D
9	553	81	1.25	8	0	B-D
9	554	81	1.25	8	0	B-D
9	555	81	1.25	8	0	B-D
9	556	81	1.25	8	0	B-D
9	557	81	1.25	8	0	B-D
9	558	81	1.25	8	0	B-D
9	559	81	1.25	8	0	B-D
9	560	81	1.25	8	0	B-D
9	561	81	1.25	8	0	B-D
9	562	81	1.25	8	0	B-D
9	563	81	1.25	8	0	B-D
9	564	81	1.25	8	0	B-D
9	565	81	1.25	8	0	B-D
9	566	81	1.25	8	0	B-D
9	567	81	1.25	8	0	B-D
9	568	81	1.25	8	0	B-D
9	569	81	1.25	8	0	B-D
9	570	81	1.25	8	0	B-D
9	571	81	1.25	8	0	B-D
9	572	81	1.25	8	0	B-D
9	573	81	1.25	8	0	B-D
9	574	81	1.25	8	0	B-D
9	575	81	1.25	8	0	B-D
9	576	81	1.25	8	0	B-D
9	577	81	1.25	8	0	B-D
9	578	81	1.25	8	0	B-D
9	579	81	1.25	8	0	B-D
9	580	81	1.25	8	0	B-D
9	581	81	1.25	8	0	B-D
9	582	81	1.25	8	0	B-D
9	583	81	1.25	8	0	B-D
9	584	81	1.25	8	0	B-D
10	585	83	0	1	1	B-D
10	586	83	0	4	1	B-D
10	587	83	0	4	1	B-D
10	588	83	0	8	0	B-D
10	589	83	0	8	0	B-D
10	590	83	0	8	0	B-D
10	591	83	0	8	0	B-D
10	592	83	0	8	0	B-D
10	593	83	0	8	0	B-D
10	594	83	0	8	0	B-D
10	595	83	0	8	0	B-D
10	596	83	0	8	0	B-D
10	597	83	0	8	0	B-D
10	598	83	0	8	0	B-D
10	599	83	0	8	0	B-D
10	600	83	0	8	0	B-D
10	601	83	0	8	0	B-D
10	602	83	0	8	0	B-D
10	603	83	0	8	0	B-D
10	604	83	0	8	0	B-D
10	605	83	0	8	0	B-D
10	606	83	0	8	0	B-D
10	607	83	0	8	0	B-D
10	608	83	0	8	0	B-D
10	609	83	0	8	0	B-D
10	610	83	0	8	0	B-D
10	611	83	0	8	0	B-D
10	612	83	0	8	0	B-D
10	613	83	0	8	0	B-D
10	614	83	0	8	0	B-D
10	615	83	0	8	0	B-D
10	616	83	0	8	0	B-D
10	617	83	0	8	0	B-D
10	618	83	0	8	0	B-D
10	619	83	0	8	0	B-D
10	620	83	0	8	0	B-D
10	621	83	0	8	0	B-D
10	622	83	0	8	0	B-D
10	623	83	0	8	0	B-D
10	624	83	0	8	0	B-D
10	625	83	0	8	0	B-D
10	626	83	0	8	0	B-D
10	627	83	0	8	0	B-D
10	628	83	0	8	0	B-D
10	629	83	0	8	0	B-D
10	630	83	0	8	0	B-D
10	631	83	0	8	0	B-D
10	632	83	0	8	0	B-D
10	633	83	0	8	0	B-D
10	634	83	0	8	0	B-D
10	635	83	0	8	0	B-D
10	636	83	0	8	0	B-D
10	637	83	0	8	0	B-D
10	638	83	0	8	0	B-D
10	639	83	0	8	0	B-D
10	640	83	0	8	0	B-D
10	641	83	0	8	0	B-D
10	642	83	0	8	0	B-D
10	643	83	0	8	0	B-D
10	644	83	0	8	0	B-D
10	645	83	0	8	0	B-D
10	646	83	0	8	0	B-D
10	647	83	0	8	0	B-D
10	648	83	0	8	0	B-D
10	649	83	0	8	0	B-D
10	650	83	0	8	0	B-D
10	651	83	0	8	0	B-D
10	652	83	0	8	0	B-D
10	653	83	0	8	0	B-D
10	654	83	0	8	0	B-D
10	655	83	0	8	0	B-D
10	656	83	0	8	0	B-D
10	657	83	0	8	0	B-D
10	658	83	0	8	0	B-D
10	659	83	0	8	0	B-D
10	660	83	0	8	0	B-D
10	661	83	0	8	0	B-D
10	662	83	0	8	0	B-D
10	663	83	0	8	0	B-D
10	664	83	0	8	0	B-D
10	665	83	0	8	0	B-D
10	666	83	0	8	0	B-D
10	667	83	0	8	0	B-D
11	668	83	0	6	1	B-D
11	669	83	0	8	0	B-D
11	670	83	0	8	0	B-D
11	671	83	0	8	0	B-D
11	672	83	0	8	0	B-D
11	673	83	0	8	0	B-D
11	674	83	0	8	0	B-D
11	675	83	0	8	0	B-D
11	676	83	0	8	0	B-D
11	677	83	0	8	0	B-D
11	678	83	0	8	0	B-D
11	679	83	0	8	0	B-D
11	680	83	0	8	0	B-D
11	681	83	0	8	0	B-D
11	682	83	0	8	0	B-D
11	683	83	0	8	0	B-D
11	684	83	0	8	0	B-D
11	685	83	0	8	0	B-D
11	686	83	0	8	0	B-D
11	687	83	0	8	0	B-D
11	688	83	0	8	0	B-D
11	689	83	0	8	0	B-D
11	690	83	0	8	0	B-D
11	691	83	0	8	0	B-D
11	692	83	0	8	0	B-D
11	693	83	0	8	0	B-D
11	694	83	0	8	0	B-D
11	695	83	0	8	0	B-D
11	696	83	0	8	0	B-D
11	697	83	0	8	0	B-D
11	698	83	0	8	0	B-D
11	699	83	0	8	0	B-D
11	700	83	0	8	0	B-D
11	701	83	0	8	0	B-D
11	702	83	0	8	0	B-D
11	703	83	0	8	0	B-D
11	704	83	0	8	0	B-D
11	705	83	0	8	0	B-D
11	706	83	0	8	0	B-D
11	707	83	0	8	0	B-D
11	708	83	0	8	0	B-D
11	709	83	0	8	0	B-D
11	710	83	0	8	0	B-D
11	711	83	0	8	0	B-D
11	712	83	0	8	0	B-D
11	713	83	0	8	0	B-D
11	714	83	0	8	0	B-D
11	715	83	0	8	0	B-D
11	716	83	0	8	0	B-D
11	717	83	0	8	0	B-D
11	718	83	0	8	0	B-D
11	719	83	0	8	0	B-D
11	720	83	0	8	0	B-D
11	721	83	0	8	0	B-D
11	722	83	0	8	0	B-D
11	723	83	0	8	0	B-D
11	724	83	0	8	0	B-D
11	725	83	0	8	0	B-D
11	726	83	0	8	0	B-D
11	727	83	0	8	0	B-D
11	728	83	0	8	0	B-D
11	729	83	0	8	0	B-D
11	730	83	0	8	0	B-D
11	731	83	0	8	0	B-D
11	732	83	0	8	0	B-D
11	733	83	0	8	0	B-D
11	734	83	0	8	0	B-D
11	735	83	0	8	0	B-D
11	736	83	0	8	0	B-D
11	737	83	0	8	0	B-D
11	738	83	0	8	0	B-D
11	739	83	0	8	0	B-D
11	740	83	0	8	0	B-D
11	741	83	0	8	0	B-D
11	742	83	0	8	0	B-D
11	743	83	0	8	0	B-D
11	744	83	0	8	0	B-D
11	745	83	0	8	0	B-D
11	746	83	0	8	0	B-D
11	747	83	0	8	0	B-D
11	748	83	0	8	0	B-D
11	749	83	0	8	0	B-D
11	750	83	0	8	0	B-D
12	751	89	0	2	1	B-D
12	752	89	0	4	1	B-D
12	753	89	0	4	1	B-D
12	754	89	0	6	1	B-D
12	755	89	0	7	1	B-D
12	756	89	0	8	0	B-D
12	757	89	0	8	0	B-D
12	758	89	0	8	0	B-D
12	759	89	0	8	0	B-D
12	760	89	0	8	0	B-D
12	761	89	0	8	0	B-D
12	762	89	0	8	0	B-D
12	763	89	0	8	0	B-D
12	764	89	0	8	0	B-D
12	765	89	0	8	0	B-D
12	766	89	0	8	0	B-D
12	767	89	0	8	0	B-D
12	768	89	0	8	0	B-D
12	769	89	0	8	0	B-D
12	770	89	0	8	0	B-D
12	771	89	0	8	0	B-D
12	772	89	0	8	0	B-D
12	773	89	0	8	0	B-D
12	774	89	0	8	0	B-D
12	775	89	0	8	0	B-D
12	776	89	0	8	0	B-D
12	777	89	0	8	0	B-D
12	778	89	0	8	0	B-D
12	779	89	0	8	0	B-D
12	780	89	0	8	0	B-D
12	781	89	0	8	0	B-D
12	782	89	0	8	0	B-D
12	783	89	0	8	0	B-D
12	784	89	0	8	0	B-D
12	785	89	0	8	0	B-D
12	786	89	0	8	0	B-D
12	787	89	0	8	0	B-D
12	788	89	0	8	0	B-D
12	789	89	0	8	0	B-D
12	790	89	0	8	0	B-D
12	791	89	0	8	0	B-D
12	792	89	0	8	0	B-D
12	793	89	0	8	0	B-D
12	794	89	0	8	0	B-D
12	795	89	0	8	0	B-D
12	796	89	0	8	0	B-D
12	797	89	0	8	0	B-D
12	798	89	0	8	0	B-D
12	799	89	0	8	0	B-D
12	800	89	0	8	0	B-D
12	801	89	0	8	0	B-D
12	802	89	0	8	0	B-D
12	803	89	0	8	0	B-D
12	804	89	0	8	0	B-D
12	805	89	0	8	0	B-D
12	806	89	0	8	0	B-D
12	807	89	0	8	0	B-D
12	808	89	0	8	0	B-D
12	809	89	0	8	0	B-D
12	810	89	0	8	0	B-D
12	811	89	0	8	0	B-D
12	812	89	0	8	0	B-D
12	813	89	0	8	0	B-D
12	814	89	0	8	0	B-D
12	815	89	0	8	0	B-D
12	816	89	0	8	0	B-D
12	817	89	0	8	0	B-D
12	818	89	0	8	0	B-D
12	819	89	0	8	0	B-D
12	820	89	0	8	0	B-D
12	821	89	0	8	0	B-D
12	822	89	0	8	0	B-D
12	823	89	0	8	0	B-D
12	824	89	0	8	0	B-D
12	825	89	0	8	0	B-D
12	826	89	0	8	0	B-D
12	827	89	0	8	0	B-D
12	828	89	0	8	0	B-D
12	829	89	0	8	0	B-D
12	830	89	0	8	0	B-D
12	831	89	0	8	0	B-D
12	832	89	0	8	0	B-D
12	833	89	0	8	0	B-D
12	834	89	0	8	0	B-D
12	835	89	0	8	0	B-D
12	836	89	0	8	0	B-D
12	837	89	0	8	0	B-D
12	838	89	0	8	0	B-D
12	839	89	0	8	0	B-D
13	840	93	0	2	1	B-D
13	841	93	0	2	1	B-D
13	842	93	0	8	0	B-D
13	843	93	0	8	0	B-D
13	844	93	0	8	0	B-D
13	845	93	0	8	0	B-D
13	846	93	0	8	0	B-D
13	847	93	0	8	0	B-D
13	848	93	0	8	0	B-D
13	849	93	0	8	0	B-D
13	850	93	0	8	0	B-D
13	851	93	0	8	0	B-D
13	852	93	0	8	0	B-D
13	853	93	0	8	0	B-D
13	854	93	0	8	0	B-D
13	855	93	0	8	0	B-D
13	856	93	0	8	0	B-D
13	857	93	0	8	0	B-D
13	858	93	0	8	0	B-D
13	859	93	0	8	0	B-D
13	860	93	0	8	0	B-D
13	861	93	0	8	0	B-D
13	862	93	0	8	0	B-D
13	863	93	0	8	0	B-D
13	864	93	0	8	0	B-D
13	865	93	0	8	0	B-D
13	866	93	0	8	0	B-D
13	867	93	0	8	0	B-D
13	868	93	0	8	0	B-D
13	869	93	0	8	0	B-D
13	870	93	0	8	0	B-D
13	871	93	0	8	0	B-D
13	872	93	0	8	0	B-D
13	873	93	0	8	0	B-D
13	874	93	0	8	0	B-D
13	875	93	0	8	0	B-D
13	876	93	0	8	0	B-D
13	877	93	0	8	0	B-D
13	878	93	0	8	0	B-D
13	879	93	0	8	0	B-D
13	880	93	0	8	0	B-D
13	881	93	0	8	0	B-D
13	882	93	0	8	0	B-D
13	883	93	0	8	0	B-D
13	884	93	0	8	0	B-D
13	885	93	0	8	0	B-D
13	886	93	0	8	0	B-D
13	887	93	0	8	0	B-D
13	888	93	0	8	0	B-D
13	889	93	0	8	0	B-D
13	890	93	0	8	0	B-D
13	891	93	0	8	0	B-D
13	892	93	0	8	0	B-D
13	893	93	0	8	0	B-D
13	894	93	0	8	0	B-D
13	895	93	0	8	0	B-D
13	896	93	0	8	0	B-D
13	897	93	0	8	0	B-D
13	898	93	0	8	0	B-D
13	899	93	0	8	0	B-D
13	900	93	0	8	0	B-D
13	901	93	0	8	0	B-D
13	902	93	0	8	0	B-D
13	903	93	0	8	0	B-D
13	904	93	0	8	0	B-D
13	905	93	0	8	0	B-D
13	906	93	0	8	0	B-D
13	907	93	0	8	0	B-D
13	908	93	0	8	0	B-D
13	909	93	0	8	0	B-D
13	910	93	0	8	0	B-D
13	911	93	0	8	0	B-D
13	912	93	0	8	0	B-D
13	913	93	0	8	0	B-D
13	914	93	0	8	0	B-D
13	915	93	0	8	0	B-D
13	916	93	0	8	0	B-D
13	917	93	0	8	0	B-D
13	918	93	0	8	0	B-D
13	919	93	0	8	0	B-D
13	920	93	0	8	0	B-D
13	921	93	0	8	0	B-D
13	922	93	0	8	0	B-D
13	923	93	0	8	0	B-D
13	924	93	0	8	0	B-D
13	925	93	0	8	0	B-D
13	926	93	0	8	0	B-D
13	927	93	0	8	0	B-D
13	928	93	0	8	0	B-D
13	929	93	0	8	0	B-D
13	930	93	0	8	0	B-D
13	931	93	0	8	0	B-D
13	932	93	0	8	0	B-D
14	933	87	2.5	6	1	B-D
14	934	87	2.5	6	1	B-D
14	935	87	2.5	8	0	B-D
14	936	87	2.5	8	0	B-D
14	937	87	2.5	8	0	B-D
14	938	87	2.5	8	0	B-D
14	939	87	2.5	8	0	B-D
14	940	87	2.5	8	0	B-D
14	941	87	2.5	8	0	B-D
14	942	87	2.5	8	0	B-D
14	943	87	2.5	8	0	B-D
14	944	87	2.5	8	0	B-D
14	945	87	2.5	8	0	B-D
14	946	87	2.5	8	0	B-D
14	947	87	2.5	8	0	B-D
14	948	87	2.5	8	0	B-D
14	949	87	2.5	8	0	B-D
14	950	87	2.5	8	0	B-D
14	951	87	2.5	8	0	B-D
14	952	87	2.5	8	0	B-D
14	953	87	2.5	8	0	B-D
14	954	87	2.5	8	0	B-D
14	955	87	2.5	8	0	B-D
14	956	87	2.5	8	0	B-D
14	957	87	2.5	8	0	B-D
14	958	87	2.5	8	0	B-D
14	959	87	2.5	8	0	B-D
14	960	87	2.5	8	0	B-D
14	961	87	2.5	8	0	B-D
14	962	87	2.5	8	0	B-D
14	963	87	2.5	8	0	B-D
14	964	87	2.5	8	0	B-D
14	965	87	2.5	8	0	B-D
14	966	87	2.5	8	0	B-D
14	967	87	2.5	8	0	B-D
14	968	87	2.5	8	0	B-D
14	969	87	2.5	8	0	B-D
14	970	87	2.5	8	0	B-D
14	971	87	2.5	8	0	B-D
14	972	87	2.5	8	0	B-D
14	973	87	2.5	8	0	B-D
14	974	87	2.5	8	0	B-D
14	975	87	2.5	8	0	B-D
14	976	87	2.5	8	0	B-D
14	977	87	2.5	8	0	B-D
14	978	87	2.5	8	0	B-D
14	979	87	2.5	8	0	B-D
14	980	87	2.5	8	0	B-D
14	981	87	2.5	8	0	B-D
14	982	87	2.5	8	0	B-D
14	983	87	2.5	8	0	B-D
14	984	87	2.5	8	0	B-D
14	985	87	2.5	8	0	B-D
14	986	87	2.5	8	0	B-D
14	987	87	2.5	8	0	B-D
14	988	87	2.5	8	0	B-D
14	989	87	2.5	8	0	B-D
14	990	87	2.5	8	0	B-D
14	991	87	2.5	8	0	B-D
14	992	87	2.5	8	0	B-D
14	993	87	2.5	8	0	B-D
14	994	87	2.5	8	0	B-D
14	995	87	2.5	8	0	B-D
14	996	87	2.5	8	0	B-D
14	997	87	2.5	8	0	B-D
14	998	87	2.5	8	0	B-D
14	999	87	2.5	8	0	B-D
14	1000	87	2.5	8	0	B-D
14	1001	87	2.5	8	0	B-D
14	1002	87	2.5	8	0	B-D
14	1003	87	2.5	8	0	B-D
14	1004	87	2.5	8	0	B-D
14	1005	87	2.5	8	0	B-D
14	1006	87	2.5	8	0	B-D
14	1007	87	2.5	8	0	B-D
14	1008	87	2.5	8	0	B-D
14	1009	87	2.5	8	0	B-D
14	1010	87	2.5	8	0	B-D
14	1011	87	2.5	8	0	B-D
14	1012	87	2.5	8	0	B-D
14	1013	87	2.5	8	0	B-D
14	1014	87	2.5	8	0	B-D
14	1015	87	2.5	8	0	B-D
14	1016	87	2.5	8	0	B-D
14	1017	87	2.5	8	0	B-D
14	1018	87	2.5	8	0	B-D
14	1019	87	2.5	8	0	B-D
15	1020	95	2.5	1	1	B-D
15	1021	95	2.5	8	0	B-D
15	1022	95	2.5	8	0	B-D
15	1023	95	2.5	8	0	B-D
15	1024	95	2.5	8	0	B-D
15	1025	95	2.5	8	0	B-D
15	1026	95	2.5	8	0	B-D
15	1027	95	2.5	8	0	B-D
15	1028	95	2.5	8	0	B-D
15	1029	95	2.5	8	0	B-D
15	1030	95	2.5	8	0	B-D
15	1031	95	2.5	8	0	B-D
15	1032	95	2.5	8	0	B-D
15	1033	95	2.5	8	0	B-D
15	1034	95	2.5	8	0	B-D
15	1035	95	2.5	8	0	B-D
15	1036	95	2.5	8	0	B-D
15	1037	95	2.5	8	0	B-D
15	1038	95	2.5	8	0	B-D
15	1039	95	2.5	8	0	B-D
15	1040	95	2.5	8	0	B-D
15	1041	95	2.5	8	0	B-D
15	1042	95	2.5	8	0	B-D
15	1043	95	2.5	8	0	B-D
15	1044	95	2.5	8	0	B-D
15	1045	95	2.5	8	0	B-D
15	1046	95	2.5	8	0	B-D
15	1047	95	2.5	8	0	B-D
15	1048	95	2.5	8	0	B-D
15	1049	95	2.5	8	0	B-D
15	1050	95	2.5	8	0	B-D
15	1051	95	2.5	8	0	B-D
15	1052	95	2.5	8	0	B-D
15	1053	95	2.5	8	0	B-D
15	1054	95	2.5	8	0	B-D
15	1055	95	2.5	8	0	B-D
15	1056	95	2.5	8	0	B-D
15	1057	95	2.5	8	0	B-D
15	1058	95	2.5	8	0	B-D
15	1059	95	2.5	8	0	B-D
15	1060	95	2.5	8	0	B-D
15	1061	95	2.5	8	0	B-D
15	1062	95	2.5	8	0	B-D
15	1063	95	2.5	8	0	B-D
15	1064	95	2.5	8	0	B-D
15	1065	95	2.5	8	0	B-D
15	1066	95	2.5	8	0	B-D
15	1067	95	2.5	8	0	B-D
15	1068	95	2.5	8	0	B-D
15	1069	95	2.5	8	0	B-D
15	1070	95	2.5	8	0	B-D
15	1071	95	2.5	8	0	B-D
15	1072	95	2.5	8	0	B-D
15	1073	95	2.5	8	0	B-D
15	1074	95	2.5	8	0	B-D
15	1075	95	2.5	8	0	B-D
15	1076	95	2.5	8	0	B-D
15	1077	95	2.5	8	0	B-D
15	1078	95	2.5	8	0	B-D
15	1079	95	2.5	8	0	B-D
15	1080	95	2.5	8	0	B-D
15	1081	95	2.5	8	0	B-D
15	1082	95	2.5	8	0	B-D
15	1083	95	2.5	8	0	B-D
15	1084	95	2.5	8	0	B-D
15	1085	95	2.5	8	0	B-D
15	1086	95	2.5	8	0	B-D
15	1087	95	2.5	8	0	B-D
15	1088	95	2.5	8	0	B-D
15	1089	95	2.5	8	0	B-D
15	1090	95	2.5	8	0	B-D
15	1091	95	2.5	8	0	B-D
15	1092	95	2.5	8	0	B-D
15	1093	95	2.5	8	0	B-D
15	1094	95	2.5	8	0	B-D
15	1095	95	2.5	8	0	B-D
15	1096	95	2.5	8	0	B-D
15	1097	95	2.5	8	0	B-D
15	1098	95	2.5	8	0	B-D
15	1099	95	2.5	8	0	B-D
15	1100	95	2.5	8	0	B-D
15	1101	95	2.5	8	0	B-D
15	1102	95	2.5	8	0	B-D
15	1103	95	2.5	8	0	B-D
15	1104	95	2.5	8	0	B-D
15	1105	95	2.5	8	0	B-D
15	1106	95	2.5	8	0	B-D
15	1107	95	2.5	8	0	B-D
15	1108	95	2.5	8	0	B-D
15	1109	95	2.5	8	0	B-D
15	1110	95	2.5	8	0	B-D
15	1111	95	2.5	8	0	B-D
15	1112	95	2.5	8	0	B-D
15	1113	95	2.5	8	0	B-D
15	1114	95	2.5	8	0	B-D
16	1115	91	2.5	7	1	B-D
16	1116	91	2.5	8	0	B-D
16	1117	91	2.5	8	0	B-D
16	1118	91	2.5	8	0	B-D
16	1119	91	2.5	8	0	B-D
16	1120	91	2.5	8	0	B-D
16	1121	91	2.5	8	0	B-D
16	1122	91	2.5	8	0	B-D
16	1123	91	2.5	8	0	B-D
16	1124	91	2.5	8	0	B-D
16	1125	91	2.5	8	0	B-D
16	1126	91	2.5	8	0	B-D
16	1127	91	2.5	8	0	B-D
16	1128	91	2.5	8	0	B-D
16	1129	91	2.5	8	0	B-D
16	1130	91	2.5	8	0	B-D
16	1131	91	2.5	8	0	B-D
16	1132	91	2.5	8	0	B-D
16	1133	91	2.5	8	0	B-D
16	1134	91	2.5	8	0	B-D
16	1135	91	2.5	8	0	B-D
16	1136	91	2.5	8	0	B-D
16	1137	91	2.5	8	0	B-D
16	1138	91	2.5	8	0	B-D
16	1139	91	2.5	8	0	B-D
16	1140	91	2.5	8	0	B-D
16	1141	91	2.5	8	0	B-D
16	1142	91	2.5	8	0	B-D
16	1143	91	2.5	8	0	B-D
16	1144	91	2.5	8	0	B-D
16	1145	91	2.5	8	0	B-D
16	1146	91	2.5	8	0	B-D
16	1147	91	2.5	8	0	B-D
16	1148	91	2.5	8	0	B-D
16	1149	91	2.5	8	0	B-D
16	1150	91	2.5	8	0	B-D
16	1151	91	2.5	8	0	B-D
16	1152	91	2.5	8	0	B-D
16	1153	91	2.5	8	0	B-D
16	1154	91	2.5	8	0	B-D
16	1155	91	2.5	8	0	B-D
16	1156	91	2.5	8	0	B-D
16	1157	91	2.5	8	0	B-D
16	1158	91	2.5	8	0	B-D
16	1159	91	2.5	8	0	B-D
16	1160	91	2.5	8	0	B-D
16	1161	91	2.5	8	0	B-D
16	1162	91	2.5	8	0	B-D
16	1163	91	2.5	8	0	B-D
16	1164	91	2.5	8	0	B-D
16	1165	91	2.5	8	0	B-D
16	1166	91	2.5	8	0	B-D
16	1167	91	2.5	8	0	B-D
16	1168	91	2.5	8	0	B-D
16	1169	91	2.5	8	0	B-D
16	1170	91	2.5	8	0	B-D
16	1171	91	2.5	8	0	B-D
16	1172	91	2.5	8	0	B-D
16	1173	91	2.5	8	0	B-D
16	1174	91	2.5	8	0	B-D
16	1175	91	2.5	8	0	B-D
16	1176	91	2.5	8	0	B-D
16	1177	91	2.5	8	0	B-D
16	1178	91	2.5	8	0	B-D
16	1179	91	2.5	8	0	B-D
16	1180	91	2.5	8	0	B-D
16	1181	91	2.5	8	0	B-D
16	1182	91	2.5	8	0	B-D
16	1183	91	2.5	8	0	B-D
16	1184	91	2.5	8	0	B-D
16	1185	91	2.5	8	0	B-D
16	1186	91	2.5	8	0	B-D
16	1187	91	2.5	8	0	B-D
16	1188	91	2.5	8	0	B-D
16	1189	91	2.5	8	0	B-D
16	1190	91	2.5	8	0	B-D
16	1191	91	2.5	8	0	B-D
16	1192	91	2.5	8	0	B-D
16	1193	91	2.5	8	0	B-D
16	1194	91	2.5	8	0	B-D
16	1195	91	2.5	8	0	B-D
16	1196	91	2.5	8	0	B-D
16	1197	91	2.5	8	0	B-D
16	1198	91	2.5	8	0	B-D
16	1199	91	2.5	8	0	B-D
16	1200	91	2.5	8	0	B-D
16	1201	91	2.5	8	0	B-D
16	1202	91	2.5	8	0	B-D
16	1203	91	2.5	8	0	B-D
16	1204	91	2.5	8	0	B-D
16	1205	91	2.5	8	0	B-D
17	1206	84	1.25	6	1	B-D
17	1207	84	1.25	6	1	B-D
17	1208	84	1.25	7	1	B-D
17	1209	84	1.25	8	0	B-D
17	1210	84	1.25	8	0	B-D
17	1211	84	1.25	8	0	B-D
17	1212	84	1.25	8	0	B-D
17	1213	84	1.25	8	0	B-D
17	1214	84	1.25	8	0	B-D
17	1215	84	1.25	8	0	B-D
17	1216	84	1.25	8	0	B-D
17	1217	84	1.25	8	0	B-D
17	1218	84	1.25	8	0	B-D
17	1219	84	1.25	8	0	B-D
17	1220	84	1.25	8	0	B-D
17	1221	84	1.25	8	0	B-D
17	1222	84	1.25	8	0	B-D
17	1223	84	1.25	8	0	B-D
17	1224	84	1.25	8	0	B-D
17	1225	84	1.25	8	0	B-D
17	1226	84	1.25	8	0	B-D
17	1227	84	1.25	8	0	B-D
17	1228	84	1.25	8	0	B-D
17	1229	84	1.25	8	0	B-D
17	1230	84	1.25	8	0	B-D
17	1231	84	1.25	8	0	B-D
17	1232	84	1.25	8	0	B-D
17	1233	84	1.25	8	0	B-D
17	1234	84	1.25	8	0	B-D
17	1235	84	1.25	8	0	B-D
17	1236	84	1.25	8	0	B-D
17	1237	84	1.25	8	0	B-D
17	1238	84	1.25	8	0	B-D
17	1239	84	1.25	8	0	B-D
17	1240	84	1.25	8	0	B-D
17	1241	84	1.25	8	0	B-D
17	1242	84	1.25	8	0	B-D
17	1243	84	1.25	8	0	B-D
17	1244	84	1.25	8	0	B-D
17	1245	84	1.25	8	0	B-D
17	1246	84	1.25	8	0	B-D
17	1247	84	1.25	8	0	B-D
17	1248	84	1.25	8	0	B-D
17	1249	84	1.25	8	0	B-D
17	1250	84	1.25	8	0	B-D
17	1251	84	1.25	8	0	B-D
17	1252	84	1.25	8	0	B-D
17	1253	84	1.25	8	0	B-D
17	1254	84	1.25	8	0	B-D
17	1255	84	1.25	8	0	B-D
17	1256	84	1.25	8	0	B-D
17	1257	84	1.25	8	0	B-D
17	1258	84	1.25	8	0	B-D
17	1259	84	1.25	8	0	B-D
17	1260	84	1.25	8	0	B-D
17	1261	84	1.25	8	0	B-D
17	1262	84	1.25	8	0	B-D
17	1263	84	1.25	8	0	B-D
17	1264	84	1.25	8	0	B-D
17	1265	84	1.25	8	0	B-D
17	1266	84	1.25	8	0	B-D
17	1267	84	1.25	8	0	B-D
17	1268	84	1.25	8	0	B-D
17	1269	84	1.25	8	0	B-D
17	1270	84	1.25	8	0	B-D
17	1271	84	1.25	8	0	B-D
17	1272	84	1.25	8	0	B-D
17	1273	84	1.25	8	0	B-D
17	1274	84	1.25	8	0	B-D
17	1275	84	1.25	8	0	B-D
17	1276	84	1.25	8	0	B-D
17	1277	84	1.25	8	0	B-D
17	1278	84	1.25	8	0	B-D
17	1279	84	1.25	8	0	B-D
17	1280	84	1.25	8	0	B-D
17	1281	84	1.25	8	0	B-D
17	1282	84	1.25	8	0	B-D
17	1283	84	1.25	8	0	B-D
17	1284	84	1.25	8	0	B-D
17	1285	84	1.25	8	0	B-D
17	1286	84	1.25	8	0	B-D
17	1287	84	1.25	8	0	B-D
17	1288	84	1.25	8	0	B-D
17	1289	84	1.25	8	0	B-D
18	1290	95	1.25	2	1	B-D
18	1291	95	1.25	8	0	B-D
18	1292	95	1.25	8	0	B-D
18	1293	95	1.25	8	0	B-D
18	1294	95	1.25	8	0	B-D
18	1295	95	1.25	8	0	B-D
18	1296	95	1.25	8	0	B-D
18	1297	95	1.25	8	0	B-D
18	1298	95	1.25	8	0	B-D
18	1299	95	1.25	8	0	B-D
18	1300	95	1.25	8	0	B-D
18	1301	95	1.25	8	0	B-D
18	1302	95	1.25	8	0	B-D
18	1303	95	1.25	8	0	B-D
18	1304	95	1.25	8	0	B-D
18	1305	95	1.25	8	0	B-D
18	1306	95	1.25	8	0	B-D
18	1307	95	1.25	8	0	B-D
18	1308	95	1.25	8	0	B-D
18	1309	95	1.25	8	0	B-D
18	1310	95	1.25	8	0	B-D
18	1311	95	1.25	8	0	B-D
18	1312	95	1.25	8	0	B-D
18	1313	95	1.25	8	0	B-D
18	1314	95	1.25	8	0	B-D
18	1315	95	1.25	8	0	B-D
18	1316	95	1.25	8	0	B-D
18	1317	95	1.25	8	0	B-D
18	1318	95	1.25	8	0	B-D
18	1319	95	1.25	8	0	B-D
18	1320	95	1.25	8	0	B-D
18	1321	95	1.25	8	0	B-D
18	1322	95	1.25	8	0	B-D
18	1323	95	1.25	8	0	B-D
18	1324	95	1.25	8	0	B-D
18	1325	95	1.25	8	0	B-D
18	1326	95	1.25	8	0	B-D
18	1327	95	1.25	8	0	B-D
18	1328	95	1.25	8	0	B-D
18	1329	95	1.25	8	0	B-D
18	1330	95	1.25	8	0	B-D
18	1331	95	1.25	8	0	B-D
18	1332	95	1.25	8	0	B-D
18	1333	95	1.25	8	0	B-D
18	1334	95	1.25	8	0	B-D
18	1335	95	1.25	8	0	B-D
18	1336	95	1.25	8	0	B-D
18	1337	95	1.25	8	0	B-D
18	1338	95	1.25	8	0	B-D
18	1339	95	1.25	8	0	B-D
18	1340	95	1.25	8	0	B-D
18	1341	95	1.25	8	0	B-D
18	1342	95	1.25	8	0	B-D
18	1343	95	1.25	8	0	B-D
18	1344	95	1.25	8	0	B-D
18	1345	95	1.25	8	0	B-D
18	1346	95	1.25	8	0	B-D
18	1347	95	1.25	8	0	B-D
18	1348	95	1.25	8	0	B-D
18	1349	95	1.25	8	0	B-D
18	1350	95	1.25	8	0	B-D
18	1351	95	1.25	8	0	B-D
18	1352	95	1.25	8	0	B-D
18	1353	95	1.25	8	0	B-D
18	1354	95	1.25	8	0	B-D
18	1355	95	1.25	8	0	B-D
18	1356	95	1.25	8	0	B-D
18	1357	95	1.25	8	0	B-D
18	1358	95	1.25	8	0	B-D
18	1359	95	1.25	8	0	B-D
18	1360	95	1.25	8	0	B-D
18	1361	95	1.25	8	0	B-D
18	1362	95	1.25	8	0	B-D
18	1363	95	1.25	8	0	B-D
18	1364	95	1.25	8	0	B-D
18	1365	95	1.25	8	0	B-D
18	1366	95	1.25	8	0	B-D
18	1367	95	1.25	8	0	B-D
18	1368	95	1.25	8	0	B-D
18	1369	95	1.25	8	0	B-D
18	1370	95	1.25	8	0	B-D
18	1371	95	1.25	8	0	B-D
18	1372	95	1.25	8	0	B-D
18	1373	95	1.25	8	0	B-D
18	1374	95	1.25	8	0	B-D
18	1375	95	1.25	8	0	B-D
18	1376	95	1.25	8	0	B-D
18	1377	95	1.25	8	0	B-D
18	1378	95	1.25	8	0	B-D
18	1379	95	1.25	8	0	B-D
18	1380	95	1.25	8	0	B-D
18	1381	95	1.25	8	0	B-D
18	1382	95	1.25	8	0	B-D
18	1383	95	1.25	8	0	B-D
18	1384	95	1.25	8	0	B-D
19	1385	75	1.25	8	0	B-D
19	1386	75	1.25	8	0	B-D
19	1387	75	1.25	8	0	B-D
19	1388	75	1.25	8	0	B-D
19	1389	75	1.25	8	0	B-D
19	1390	75	1.25	8	0	B-D
19	1391	75	1.25	8	0	B-D
19	1392	75	1.25	8	0	B-D
19	1393	75	1.25	8	0	B-D
19	1394	75	1.25	8	0	B-D
19	1395	75	1.25	8	0	B-D
19	1396	75	1.25	8	0	B-D
19	1397	75	1.25	8	0	B-D
19	1398	75	1.25	8	0	B-D
19	1399	75	1.25	8	0	B-D
19	1400	75	1.25	8	0	B-D
19	1401	75	1.25	8	0	B-D
19	1402	75	1.25	8	0	B-D
19	1403	75	1.25	8	0	B-D
19	1404	75	1.25	8	0	B-D
19	1405	75	1.25	8	0	B-D
19	1406	75	1.25	8	0	B-D
19	1407	75	1.25	8	0	B-D
19	1408	75	1.25	8	0	B-D
19	1409	75	1.25	8	0	B-D
19	1410	75	1.25	8	0	B-D
19	1411	75	1.25	8	0	B-D
19	1412	75	1.25	8	0	B-D
19	1413	75	1.25	8	0	B-D
19	1414	75	1.25	8	0	B-D
19	1415	75	1.25	8	0	B-D
19	1416	75	1.25	8	0	B-D
19	1417	75	1.25	8	0	B-D
19	1418	75	1.25	8	0	B-D
19	1419	75	1.25	8	0	B-D
19	1420	75	1.25	8	0	B-D
19	1421	75	1.25	8	0	B-D
19	1422	75	1.25	8	0	B-D
19	1423	75	1.25	8	0	B-D
19	1424	75	1.25	8	0	B-D
19	1425	75	1.25	8	0	B-D
19	1426	75	1.25	8	0	B-D
19	1427	75	1.25	8	0	B-D
19	1428	75	1.25	8	0	B-D
19	1429	75	1.25	8	0	B-D
19	1430	75	1.25	8	0	B-D
19	1431	75	1.25	8	0	B-D
19	1432	75	1.25	8	0	B-D
19	1433	75	1.25	8	0	B-D
19	1434	75	1.25	8	0	B-D
19	1435	75	1.25	8	0	B-D
19	1436	75	1.25	8	0	B-D
19	1437	75	1.25	8	0	B-D
19	1438	75	1.25	8	0	B-D
19	1439	75	1.25	8	0	B-D
19	1440	75	1.25	8	0	B-D
19	1441	75	1.25	8	0	B-D
19	1442	75	1.25	8	0	B-D
19	1443	75	1.25	8	0	B-D
19	1444	75	1.25	8	0	B-D
19	1445	75	1.25	8	0	B-D
19	1446	75	1.25	8	0	B-D
19	1447	75	1.25	8	0	B-D
19	1448	75	1.25	8	0	B-D
19	1449	75	1.25	8	0	B-D
19	1450	75	1.25	8	0	B-D
19	1451	75	1.25	8	0	B-D
19	1452	75	1.25	8	0	B-D
19	1453	75	1.25	8	0	B-D
19	1454	75	1.25	8	0	B-D
19	1455	75	1.25	8	0	B-D
19	1456	75	1.25	8	0	B-D
19	1457	75	1.25	8	0	B-D
19	1458	75	1.25	8	0	B-D
19	1459	75	1.25	8	0	B-D
42	3005	73	0	2	1	S-D
42	3006	73	0	4	1	S-D
42	3007	73	0	7	1	S-D
42	3008	73	0	7	1	S-D
42	3009	73	0	7	1	S-D
42	3010	73	0	7	1	S-D
42	3011	73	0	7	1	S-D
42	3012	73	0	7	1	S-D
42	3013	73	0	8	0	S-D
42	3014	73	0	8	0	S-D
42	3015	73	0	8	0	S-D
42	3016	73	0	8	0	S-D
42	3017	73	0	8	0	S-D
42	3018	73	0	8	0	S-D
42	3019	73	0	8	0	S-D
42	3020	73	0	8	0	S-D
42	3021	73	0	8	0	S-D
42	3022	73	0	8	0	S-D
42	3023	73	0	8	0	S-D
42	3024	73	0	8	0	S-D
42	3025	73	0	8	0	S-D
42	3026	73	0	8	0	S-D
42	3027	73	0	8	0	S-D
42	3028	73	0	8	0	S-D
42	3029	73	0	8	0	S-D
42	3030	73	0	8	0	S-D
42	3031	73	0	8	0	S-D
42	3032	73	0	8	0	S-D
42	3033	73	0	8	0	S-D
42	3034	73	0	8	0	S-D
42	3035	73	0	8	0	S-D
42	3036	73	0	8	0	S-D
42	3037	73	0	8	0	S-D
42	3038	73	0	8	0	S-D
42	3039	73	0	8	0	S-D
42	3040	73	0	8	0	S-D
42	3041	73	0	8	0	S-D
42	3042	73	0	8	0	S-D
42	3043	73	0	8	0	S-D
42	3044	73	0	8	0	S-D
42	3045	73	0	8	0	S-D
42	3046	73	0	8	0	S-D
42	3047	73	0	8	0	S-D
42	3048	73	0	8	0	S-D
42	3049	73	0	8	0	S-D
42	3050	73	0	8	0	S-D
42	3051	73	0	8	0	S-D
42	3052	73	0	8	0	S-D
42	3053	73	0	8	0	S-D
42	3054	73	0	8	0	S-D
42	3055	73	0	8	0	S-D
42	3056	73	0	8	0	S-D
42	3057	73	0	8	0	S-D
42	3058	73	0	8	0	S-D
42	3059	73	0	8	0	S-D
42	3060	73	0	8	0	S-D
42	3061	73	0	8	0	S-D
42	3062	73	0	8	0	S-D
42	3063	73	0	8	0	S-D
42	3064	73	0	8	0	S-D
42	3065	73	0	8	0	S-D
42	3066	73	0	8	0	S-D
42	3067	73	0	8	0	S-D
42	3068	73	0	8	0	S-D
42	3069	73	0	8	0	S-D
42	3070	73	0	8	0	S-D
42	3071	73	0	8	0	S-D
42	3072	73	0	8	0	S-D
42	3073	73	0	8	0	S-D
42	3074	73	0	8	0	S-D
42	3075	73	0	8	0	S-D
42	3076	73	0	8	0	S-D
42	3077	73	0	8	0	S-D
43	3078	81	0	1	1	S-D
43	3079	81	0	4	1	S-D
43	3080	81	0	7	1	S-D
43	3081	81	0	7	1	S-D
43	3082	81	0	7	1	S-D
43	3083	81	0	7	1	S-D
43	3084	81	0	7	1	S-D
43	3085	81	0	7	1	S-D
43	3086	81	0	7	1	S-D
43	3087	81	0	7	1	S-D
43	3088	81	0	7	1	S-D
43	3089	81	0	7	1	S-D
43	3090	81	0	7	1	S-D
43	3091	81	0	7	1	S-D
43	3092	81	0	7	1	S-D
43	3093	81	0	7	1	S-D
43	3094	81	0	7	1	S-D
43	3095	81	0	8	0	S-D
43	3096	81	0	8	0	S-D
43	3097	81	0	8	0	S-D
43	3098	81	0	8	0	S-D
43	3099	81	0	8	0	S-D
43	3100	81	0	8	0	S-D
43	3101	81	0	8	0	S-D
43	3102	81	0	8	0	S-D
43	3103	81	0	8	0	S-D
43	3104	81	0	8	0	S-D
43	3105	81	0	8	0	S-D
43	3106	81	0	8	0	S-D
43	3107	81	0	8	0	S-D
43	3108	81	0	8	0	S-D
43	3109	81	0	8	0	S-D
43	3110	81	0	8	0	S-D
43	3111	81	0	8	0	S-D
43	3112	81	0	8	0	S-D
43	3113	81	0	8	0	S-D
43	3114	81	0	8	0	S-D
43	3115	81	0	8	0	S-D
43	3116	81	0	8	0	S-D
43	3117	81	0	8	0	S-D
43	3118	81	0	8	0	S-D
43	3119	81	0	8	0	S-D
43	3120	81	0	8	0	S-D
43	3121	81	0	8	0	S-D
43	3122	81	0	8	0	S-D
43	3123	81	0	8	0	S-D
43	3124	81	0	8	0	S-D
43	3125	81	0	8	0	S-D
43	3126	81	0	8	0	S-D
43	3127	81	0	8	0	S-D
43	3128	81	0	8	0	S-D
43	3129	81	0	8	0	S-D
43	3130	81	0	8	0	S-D
43	3131	81	0	8	0	S-D
43	3132	81	0	8	0	S-D
43	3133	81	0	8	0	S-D
43	3134	81	0	8	0	S-D
43	3135	81	0	8	0	S-D
43	3136	81	0	8	0	S-D
43	3137	81	0	8	0	S-D
43	3138	81	0	8	0	S-D
43	3139	81	0	8	0	S-D
43	3140	81	0	8	0	S-D
43	3141	81	0	8	0	S-D
43	3142	81	0	8	0	S-D
43	3143	81	0	8	0	S-D
43	3144	81	0	8	0	S-D
43	3145	81	0	8	0	S-D
43	3146	81	0	8	0	S-D
43	3147	81	0	8	0	S-D
43	3148	81	0	8	0	S-D
43	3149	81	0	8	0	S-D
43	3150	81	0	8	0	S-D
43	3151	81	0	8	0	S-D
43	3152	81	0	8	0	S-D
43	3153	81	0	8	0	S-D
43	3154	81	0	8	0	S-D
43	3155	81	0	8	0	S-D
43	3156	81	0	8	0	S-D
43	3157	81	0	8	0	S-D
43	3158	81	0	8	0	S-D
44	3159	92	2.5	1	1	S-D
44	3160	92	2.5	1	1	S-D
44	3161	92	2.5	1	1	S-D
44	3162	92	2.5	1	1	S-D
44	3163	92	2.5	7	1	S-D
44	3164	92	2.5	7	1	S-D
44	3165	92	2.5	7	1	S-D
44	3166	92	2.5	7	1	S-D
44	3167	92	2.5	7	1	S-D
44	3168	92	2.5	8	0	S-D
44	3169	92	2.5	8	0	S-D
44	3170	92	2.5	8	0	S-D
44	3171	92	2.5	8	0	S-D
44	3172	92	2.5	8	0	S-D
44	3173	92	2.5	8	0	S-D
44	3174	92	2.5	8	0	S-D
44	3175	92	2.5	8	0	S-D
44	3176	92	2.5	8	0	S-D
44	3177	92	2.5	8	0	S-D
44	3178	92	2.5	8	0	S-D
44	3179	92	2.5	8	0	S-D
44	3180	92	2.5	8	0	S-D
44	3181	92	2.5	8	0	S-D
44	3182	92	2.5	8	0	S-D
44	3183	92	2.5	8	0	S-D
44	3184	92	2.5	8	0	S-D
44	3185	92	2.5	8	0	S-D
44	3186	92	2.5	8	0	S-D
44	3187	92	2.5	8	0	S-D
44	3188	92	2.5	8	0	S-D
44	3189	92	2.5	8	0	S-D
44	3190	92	2.5	8	0	S-D
44	3191	92	2.5	8	0	S-D
44	3192	92	2.5	8	0	S-D
44	3193	92	2.5	8	0	S-D
44	3194	92	2.5	8	0	S-D
44	3195	92	2.5	8	0	S-D
44	3196	92	2.5	8	0	S-D
44	3197	92	2.5	8	0	S-D
44	3198	92	2.5	8	0	S-D
44	3199	92	2.5	8	0	S-D
44	3200	92	2.5	8	0	S-D
44	3201	92	2.5	8	0	S-D
44	3202	92	2.5	8	0	S-D
44	3203	92	2.5	8	0	S-D
44	3204	92	2.5	8	0	S-D
44	3205	92	2.5	8	0	S-D
44	3206	92	2.5	8	0	S-D
44	3207	92	2.5	8	0	S-D
44	3208	92	2.5	8	0	S-D
44	3209	92	2.5	8	0	S-D
44	3210	92	2.5	8	0	S-D
44	3211	92	2.5	8	0	S-D
44	3212	92	2.5	8	0	S-D
44	3213	92	2.5	8	0	S-D
44	3214	92	2.5	8	0	S-D
44	3215	92	2.5	8	0	S-D
44	3216	92	2.5	8	0	S-D
44	3217	92	2.5	8	0	S-D
44	3218	92	2.5	8	0	S-D
44	3219	92	2.5	8	0	S-D
44	3220	92	2.5	8	0	S-D
44	3221	92	2.5	8	0	S-D
44	3222	92	2.5	8	0	S-D
44	3223	92	2.5	8	0	S-D
44	3224	92	2.5	8	0	S-D
44	3225	92	2.5	8	0	S-D
44	3226	92	2.5	8	0	S-D
44	3227	92	2.5	8	0	S-D
44	3228	92	2.5	8	0	S-D
44	3229	92	2.5	8	0	S-D
44	3230	92	2.5	8	0	S-D
44	3231	92	2.5	8	0	S-D
44	3232	92	2.5	8	0	S-D
44	3233	92	2.5	8	0	S-D
44	3234	92	2.5	8	0	S-D
44	3235	92	2.5	8	0	S-D
44	3236	92	2.5	8	0	S-D
44	3237	92	2.5	8	0	S-D
44	3238	92	2.5	8	0	S-D
44	3239	92	2.5	8	0	S-D
44	3240	92	2.5	8	0	S-D
44	3241	92	2.5	8	0	S-D
44	3242	92	2.5	8	0	S-D
44	3243	92	2.5	8	0	S-D
44	3244	92	2.5	8	0	S-D
44	3245	92	2.5	8	0	S-D
44	3246	92	2.5	8	0	S-D
44	3247	92	2.5	8	0	S-D
44	3248	92	2.5	8	0	S-D
44	3249	92	2.5	8	0	S-D
44	3250	92	2.5	8	0	S-D
45	3251	76	2.5	1	1	S-D
45	3252	76	2.5	8	0	S-D
45	3253	76	2.5	8	0	S-D
45	3254	76	2.5	8	0	S-D
45	3255	76	2.5	8	0	S-D
45	3256	76	2.5	8	0	S-D
45	3257	76	2.5	8	0	S-D
45	3258	76	2.5	8	0	S-D
45	3259	76	2.5	8	0	S-D
45	3260	76	2.5	8	0	S-D
45	3261	76	2.5	8	0	S-D
45	3262	76	2.5	8	0	S-D
45	3263	76	2.5	8	0	S-D
45	3264	76	2.5	8	0	S-D
45	3265	76	2.5	8	0	S-D
45	3266	76	2.5	8	0	S-D
45	3267	76	2.5	8	0	S-D
45	3268	76	2.5	8	0	S-D
45	3269	76	2.5	8	0	S-D
45	3270	76	2.5	8	0	S-D
45	3271	76	2.5	8	0	S-D
45	3272	76	2.5	8	0	S-D
45	3273	76	2.5	8	0	S-D
45	3274	76	2.5	8	0	S-D
45	3275	76	2.5	8	0	S-D
45	3276	76	2.5	8	0	S-D
45	3277	76	2.5	8	0	S-D
45	3278	76	2.5	8	0	S-D
45	3279	76	2.5	8	0	S-D
45	3280	76	2.5	8	0	S-D
45	3281	76	2.5	8	0	S-D
45	3282	76	2.5	8	0	S-D
45	3283	76	2.5	8	0	S-D
45	3284	76	2.5	8	0	S-D
45	3285	76	2.5	8	0	S-D
45	3286	76	2.5	8	0	S-D
45	3287	76	2.5	8	0	S-D
45	3288	76	2.5	8	0	S-D
45	3289	76	2.5	8	0	S-D
45	3290	76	2.5	8	0	S-D
45	3291	76	2.5	8	0	S-D
45	3292	76	2.5	8	0	S-D
45	3293	76	2.5	8	0	S-D
45	3294	76	2.5	8	0	S-D
45	3295	76	2.5	8	0	S-D
45	3296	76	2.5	8	0	S-D
45	3297	76	2.5	8	0	S-D
45	3298	76	2.5	8	0	S-D
45	3299	76	2.5	8	0	S-D
45	3300	76	2.5	8	0	S-D
45	3301	76	2.5	8	0	S-D
45	3302	76	2.5	8	0	S-D
45	3303	76	2.5	8	0	S-D
45	3304	76	2.5	8	0	S-D
45	3305	76	2.5	8	0	S-D
45	3306	76	2.5	8	0	S-D
45	3307	76	2.5	8	0	S-D
45	3308	76	2.5	8	0	S-D
45	3309	76	2.5	8	0	S-D
45	3310	76	2.5	8	0	S-D
45	3311	76	2.5	8	0	S-D
45	3312	76	2.5	8	0	S-D
45	3313	76	2.5	8	0	S-D
45	3314	76	2.5	8	0	S-D
45	3315	76	2.5	8	0	S-D
45	3316	76	2.5	8	0	S-D
45	3317	76	2.5	8	0	S-D
45	3318	76	2.5	8	0	S-D
45	3319	76	2.5	8	0	S-D
45	3320	76	2.5	8	0	S-D
45	3321	76	2.5	8	0	S-D
45	3322	76	2.5	8	0	S-D
45	3323	76	2.5	8	0	S-D
45	3324	76	2.5	8	0	S-D
45	3325	76	2.5	8	0	S-D
45	3326	76	2.5	8	0	S-D
46	3327	84	2.5	1	1	S-D
46	3328	84	2.5	1	1	S-D
46	3329	84	2.5	1	1	S-D
46	3330	84	2.5	1	1	S-D
46	3331	84	2.5	1	1	S-D
46	3332	84	2.5	1	1	S-D
46	3333	84	2.5	1	1	S-D
46	3334	84	2.5	1	1	S-D
46	3335	84	2.5	1	1	S-D
46	3336	84	2.5	3	1	S-D
46	3337	84	2.5	6	1	S-D
46	3338	84	2.5	6	1	S-D
46	3339	84	2.5	6	1	S-D
46	3340	84	2.5	6	1	S-D
46	3341	84	2.5	6	1	S-D
46	3342	84	2.5	6	1	S-D
46	3343	84	2.5	6	1	S-D
46	3344	84	2.5	8	0	S-D
46	3345	84	2.5	8	0	S-D
46	3346	84	2.5	8	0	S-D
46	3347	84	2.5	8	0	S-D
46	3348	84	2.5	8	0	S-D
46	3349	84	2.5	8	0	S-D
46	3350	84	2.5	8	0	S-D
46	3351	84	2.5	8	0	S-D
46	3352	84	2.5	8	0	S-D
46	3353	84	2.5	8	0	S-D
46	3354	84	2.5	8	0	S-D
46	3355	84	2.5	8	0	S-D
46	3356	84	2.5	8	0	S-D
46	3357	84	2.5	8	0	S-D
46	3358	84	2.5	8	0	S-D
46	3359	84	2.5	8	0	S-D
46	3360	84	2.5	8	0	S-D
46	3361	84	2.5	8	0	S-D
46	3362	84	2.5	8	0	S-D
46	3363	84	2.5	8	0	S-D
46	3364	84	2.5	8	0	S-D
46	3365	84	2.5	8	0	S-D
46	3366	84	2.5	8	0	S-D
46	3367	84	2.5	8	0	S-D
46	3368	84	2.5	8	0	S-D
46	3369	84	2.5	8	0	S-D
46	3370	84	2.5	8	0	S-D
46	3371	84	2.5	8	0	S-D
46	3372	84	2.5	8	0	S-D
46	3373	84	2.5	8	0	S-D
46	3374	84	2.5	8	0	S-D
46	3375	84	2.5	8	0	S-D
46	3376	84	2.5	8	0	S-D
46	3377	84	2.5	8	0	S-D
46	3378	84	2.5	8	0	S-D
46	3379	84	2.5	8	0	S-D
46	3380	84	2.5	8	0	S-D
46	3381	84	2.5	8	0	S-D
46	3382	84	2.5	8	0	S-D
46	3383	84	2.5	8	0	S-D
46	3384	84	2.5	8	0	S-D
46	3385	84	2.5	8	0	S-D
46	3386	84	2.5	8	0	S-D
46	3387	84	2.5	8	0	S-D
46	3388	84	2.5	8	0	S-D
46	3389	84	2.5	8	0	S-D
46	3390	84	2.5	8	0	S-D
46	3391	84	2.5	8	0	S-D
46	3392	84	2.5	8	0	S-D
46	3393	84	2.5	8	0	S-D
46	3394	84	2.5	8	0	S-D
46	3395	84	2.5	8	0	S-D
46	3396	84	2.5	8	0	S-D
46	3397	84	2.5	8	0	S-D
46	3398	84	2.5	8	0	S-D
46	3399	84	2.5	8	0	S-D
46	3400	84	2.5	8	0	S-D
46	3401	84	2.5	8	0	S-D
46	3402	84	2.5	8	0	S-D
46	3403	84	2.5	8	0	S-D
46	3404	84	2.5	8	0	S-D
46	3405	84	2.5	8	0	S-D
46	3406	84	2.5	8	0	S-D
46	3407	84	2.5	8	0	S-D
46	3408	84	2.5	8	0	S-D
46	3409	84	2.5	8	0	S-D
46	3410	84	2.5	8	0	S-D
47	3411	76	2.5	1	1	S-D
47	3412	76	2.5	8	0	S-D
47	3413	76	2.5	8	0	S-D
47	3414	76	2.5	8	0	S-D
47	3415	76	2.5	8	0	S-D
47	3416	76	2.5	8	0	S-D
47	3417	76	2.5	8	0	S-D
47	3418	76	2.5	8	0	S-D
47	3419	76	2.5	8	0	S-D
47	3420	76	2.5	8	0	S-D
47	3421	76	2.5	8	0	S-D
47	3422	76	2.5	8	0	S-D
47	3423	76	2.5	8	0	S-D
47	3424	76	2.5	8	0	S-D
47	3425	76	2.5	8	0	S-D
47	3426	76	2.5	8	0	S-D
47	3427	76	2.5	8	0	S-D
47	3428	76	2.5	8	0	S-D
47	3429	76	2.5	8	0	S-D
47	3430	76	2.5	8	0	S-D
47	3431	76	2.5	8	0	S-D
47	3432	76	2.5	8	0	S-D
47	3433	76	2.5	8	0	S-D
47	3434	76	2.5	8	0	S-D
47	3435	76	2.5	8	0	S-D
47	3436	76	2.5	8	0	S-D
47	3437	76	2.5	8	0	S-D
47	3438	76	2.5	8	0	S-D
47	3439	76	2.5	8	0	S-D
47	3440	76	2.5	8	0	S-D
47	3441	76	2.5	8	0	S-D
47	3442	76	2.5	8	0	S-D
47	3443	76	2.5	8	0	S-D
47	3444	76	2.5	8	0	S-D
47	3445	76	2.5	8	0	S-D
47	3446	76	2.5	8	0	S-D
47	3447	76	2.5	8	0	S-D
47	3448	76	2.5	8	0	S-D
47	3449	76	2.5	8	0	S-D
47	3450	76	2.5	8	0	S-D
47	3451	76	2.5	8	0	S-D
47	3452	76	2.5	8	0	S-D
47	3453	76	2.5	8	0	S-D
47	3454	76	2.5	8	0	S-D
47	3455	76	2.5	8	0	S-D
47	3456	76	2.5	8	0	S-D
47	3457	76	2.5	8	0	S-D
47	3458	76	2.5	8	0	S-D
47	3459	76	2.5	8	0	S-D
47	3460	76	2.5	8	0	S-D
47	3461	76	2.5	8	0	S-D
47	3462	76	2.5	8	0	S-D
47	3463	76	2.5	8	0	S-D
47	3464	76	2.5	8	0	S-D
47	3465	76	2.5	8	0	S-D
47	3466	76	2.5	8	0	S-D
47	3467	76	2.5	8	0	S-D
47	3468	76	2.5	8	0	S-D
47	3469	76	2.5	8	0	S-D
47	3470	76	2.5	8	0	S-D
47	3471	76	2.5	8	0	S-D
47	3472	76	2.5	8	0	S-D
47	3473	76	2.5	8	0	S-D
47	3474	76	2.5	8	0	S-D
47	3475	76	2.5	8	0	S-D
47	3476	76	2.5	8	0	S-D
47	3477	76	2.5	8	0	S-D
47	3478	76	2.5	8	0	S-D
47	3479	76	2.5	8	0	S-D
47	3480	76	2.5	8	0	S-D
47	3481	76	2.5	8	0	S-D
47	3482	76	2.5	8	0	S-D
47	3483	76	2.5	8	0	S-D
47	3484	76	2.5	8	0	S-D
47	3485	76	2.5	8	0	S-D
47	3486	76	2.5	8	0	S-D
48	3487	77	1.25	1	1	S-D
48	3488	77	1.25	6	1	S-D
48	3489	77	1.25	7	1	S-D
48	3490	77	1.25	7	1	S-D
48	3491	77	1.25	7	1	S-D
48	3492	77	1.25	7	1	S-D
48	3493	77	1.25	7	1	S-D
48	3494	77	1.25	7	1	S-D
48	3495	77	1.25	8	0	S-D
48	3496	77	1.25	8	0	S-D
48	3497	77	1.25	8	0	S-D
48	3498	77	1.25	8	0	S-D
48	3499	77	1.25	8	0	S-D
48	3500	77	1.25	8	0	S-D
48	3501	77	1.25	8	0	S-D
48	3502	77	1.25	8	0	S-D
48	3503	77	1.25	8	0	S-D
48	3504	77	1.25	8	0	S-D
48	3505	77	1.25	8	0	S-D
48	3506	77	1.25	8	0	S-D
48	3507	77	1.25	8	0	S-D
48	3508	77	1.25	8	0	S-D
48	3509	77	1.25	8	0	S-D
48	3510	77	1.25	8	0	S-D
48	3511	77	1.25	8	0	S-D
48	3512	77	1.25	8	0	S-D
48	3513	77	1.25	8	0	S-D
48	3514	77	1.25	8	0	S-D
48	3515	77	1.25	8	0	S-D
48	3516	77	1.25	8	0	S-D
48	3517	77	1.25	8	0	S-D
48	3518	77	1.25	8	0	S-D
48	3519	77	1.25	8	0	S-D
48	3520	77	1.25	8	0	S-D
48	3521	77	1.25	8	0	S-D
48	3522	77	1.25	8	0	S-D
48	3523	77	1.25	8	0	S-D
48	3524	77	1.25	8	0	S-D
48	3525	77	1.25	8	0	S-D
48	3526	77	1.25	8	0	S-D
48	3527	77	1.25	8	0	S-D
48	3528	77	1.25	8	0	S-D
48	3529	77	1.25	8	0	S-D
48	3530	77	1.25	8	0	S-D
48	3531	77	1.25	8	0	S-D
48	3532	77	1.25	8	0	S-D
48	3533	77	1.25	8	0	S-D
48	3534	77	1.25	8	0	S-D
48	3535	77	1.25	8	0	S-D
48	3536	77	1.25	8	0	S-D
48	3537	77	1.25	8	0	S-D
48	3538	77	1.25	8	0	S-D
48	3539	77	1.25	8	0	S-D
48	3540	77	1.25	8	0	S-D
48	3541	77	1.25	8	0	S-D
48	3542	77	1.25	8	0	S-D
48	3543	77	1.25	8	0	S-D
48	3544	77	1.25	8	0	S-D
[truncated: 797 more rows]

## Sheet: IMI_survival (Fig. 2)
Bee cage	Bee	Total bees in cage	Concentration (mg/l)	Time (days)	Status	Series
21	1460	78	0	1	1	B-D
21	1461	78	0	4	1	B-D
21	1462	78	0	8	0	B-D
21	1463	78	0	8	0	B-D
21	1464	78	0	8	0	B-D
21	1465	78	0	8	0	B-D
21	1466	78	0	8	0	B-D
21	1467	78	0	8	0	B-D
21	1468	78	0	8	0	B-D
21	1469	78	0	8	0	B-D
21	1470	78	0	8	0	B-D
21	1471	78	0	8	0	B-D
21	1472	78	0	8	0	B-D
21	1473	78	0	8	0	B-D
21	1474	78	0	8	0	B-D
21	1475	78	0	8	0	B-D
21	1476	78	0	8	0	B-D
21	1477	78	0	8	0	B-D
21	1478	78	0	8	0	B-D
21	1479	78	0	8	0	B-D
21	1480	78	0	8	0	B-D
21	1481	78	0	8	0	B-D
21	1482	78	0	8	0	B-D
21	1483	78	0	8	0	B-D
21	1484	78	0	8	0	B-D
21	1485	78	0	8	0	B-D
21	1486	78	0	8	0	B-D
21	1487	78	0	8	0	B-D
21	1488	78	0	8	0	B-D
21	1489	78	0	8	0	B-D
21	1490	78	0	8	0	B-D
21	1491	78	0	8	0	B-D
21	1492	78	0	8	0	B-D
21	1493	78	0	8	0	B-D
21	1494	78	0	8	0	B-D
21	1495	78	0	8	0	B-D
21	1496	78	0	8	0	B-D
21	1497	78	0	8	0	B-D
21	1498	78	0	8	0	B-D
21	1499	78	0	8	0	B-D
21	1500	78	0	8	0	B-D
21	1501	78	0	8	0	B-D
21	1502	78	0	8	0	B-D
21	1503	78	0	8	0	B-D
21	1504	78	0	8	0	B-D
21	1505	78	0	8	0	B-D
21	1506	78	0	8	0	B-D
21	1507	78	0	8	0	B-D
21	1508	78	0	8	0	B-D
21	1509	78	0	8	0	B-D
21	1510	78	0	8	0	B-D
21	1511	78	0	8	0	B-D
21	1512	78	0	8	0	B-D
21	1513	78	0	8	0	B-D
21	1514	78	0	8	0	B-D
21	1515	78	0	8	0	B-D
21	1516	78	0	8	0	B-D
21	1517	78	0	8	0	B-D
21	1518	78	0	8	0	B-D
21	1519	78	0	8	0	B-D
21	1520	78	0	8	0	B-D
21	1521	78	0	8	0	B-D
21	1522	78	0	8	0	B-D
21	1523	78	0	8	0	B-D
21	1524	78	0	8	0	B-D
21	1525	78	0	8	0	B-D
21	1526	78	0	8	0	B-D
21	1527	78	0	8	0	B-D
21	1528	78	0	8	0	B-D
21	1529	78	0	8	0	B-D
21	1530	78	0	8	0	B-D
21	1531	78	0	8	0	B-D
21	1532	78	0	8	0	B-D
21	1533	78	0	8	0	B-D
21	1534	78	0	8	0	B-D
21	1535	78	0	8	0	B-D
21	1536	78	0	8	0	B-D
21	1537	78	0	8	0	B-D
22	1538	93	0	2	1	B-D
22	1539	93	0	7	1	B-D
22	1540	93	0	7	1	B-D
22	1541	93	0	7	1	B-D
22	1542	93	0	7	1	B-D
22	1543	93	0	8	0	B-D
22	1544	93	0	8	0	B-D
22	1545	93	0	8	0	B-D
22	1546	93	0	8	0	B-D
22	1547	93	0	8	0	B-D
22	1548	93	0	8	0	B-D
22	1549	93	0	8	0	B-D
22	1550	93	0	8	0	B-D
22	1551	93	0	8	0	B-D
22	1552	93	0	8	0	B-D
22	1553	93	0	8	0	B-D
22	1554	93	0	8	0	B-D
22	1555	93	0	8	0	B-D
22	1556	93	0	8	0	B-D
22	1557	93	0	8	0	B-D
22	1558	93	0	8	0	B-D
22	1559	93	0	8	0	B-D
22	1560	93	0	8	0	B-D
22	1561	93	0	8	0	B-D
22	1562	93	0	8	0	B-D
22	1563	93	0	8	0	B-D
22	1564	93	0	8	0	B-D
22	1565	93	0	8	0	B-D
22	1566	93	0	8	0	B-D
22	1567	93	0	8	0	B-D
22	1568	93	0	8	0	B-D
22	1569	93	0	8	0	B-D
22	1570	93	0	8	0	B-D
22	1571	93	0	8	0	B-D
22	1572	93	0	8	0	B-D
22	1573	93	0	8	0	B-D
22	1574	93	0	8	0	B-D
22	1575	93	0	8	0	B-D
22	1576	93	0	8	0	B-D
22	1577	93	0	8	0	B-D
22	1578	93	0	8	0	B-D
22	1579	93	0	8	0	B-D
22	1580	93	0	8	0	B-D
22	1581	93	0	8	0	B-D
22	1582	93	0	8	0	B-D
22	1583	93	0	8	0	B-D
22	1584	93	0	8	0	B-D
22	1585	93	0	8	0	B-D
22	1586	93	0	8	0	B-D
22	1587	93	0	8	0	B-D
22	1588	93	0	8	0	B-D
22	1589	93	0	8	0	B-D
22	1590	93	0	8	0	B-D
22	1591	93	0	8	0	B-D
22	1592	93	0	8	0	B-D
22	1593	93	0	8	0	B-D
22	1594	93	0	8	0	B-D
22	1595	93	0	8	0	B-D
22	1596	93	0	8	0	B-D
22	1597	93	0	8	0	B-D
22	1598	93	0	8	0	B-D
22	1599	93	0	8	0	B-D
22	1600	93	0	8	0	B-D
22	1601	93	0	8	0	B-D
22	1602	93	0	8	0	B-D
22	1603	93	0	8	0	B-D
22	1604	93	0	8	0	B-D
22	1605	93	0	8	0	B-D
22	1606	93	0	8	0	B-D
22	1607	93	0	8	0	B-D
22	1608	93	0	8	0	B-D
22	1609	93	0	8	0	B-D
22	1610	93	0	8	0	B-D
22	1611	93	0	8	0	B-D
22	1612	93	0	8	0	B-D
22	1613	93	0	8	0	B-D
22	1614	93	0	8	0	B-D
22	1615	93	0	8	0	B-D
22	1616	93	0	8	0	B-D
22	1617	93	0	8	0	B-D
22	1618	93	0	8	0	B-D
22	1619	93	0	8	0	B-D
22	1620	93	0	8	0	B-D
22	1621	93	0	8	0	B-D
22	1622	93	0	8	0	B-D
22	1623	93	0	8	0	B-D
22	1624	93	0	8	0	B-D
22	1625	93	0	8	0	B-D
22	1626	93	0	8	0	B-D
22	1627	93	0	8	0	B-D
22	1628	93	0	8	0	B-D
22	1629	93	0	8	0	B-D
22	1630	93	0	8	0	B-D
23	1631	77	0	1	1	B-D
23	1632	77	0	1	1	B-D
23	1633	77	0	1	1	B-D
23	1634	77	0	2	1	B-D
23	1635	77	0	3	1	B-D
23	1636	77	0	3	1	B-D
23	1637	77	0	4	1	B-D
23	1638	77	0	6	1	B-D
23	1639	77	0	6	1	B-D
23	1640	77	0	7	1	B-D
23	1641	77	0	7	1	B-D
23	1642	77	0	7	1	B-D
23	1643	77	0	7	1	B-D
23	1644	77	0	7	1	B-D
23	1645	77	0	7	1	B-D
23	1646	77	0	7	1	B-D
23	1647	77	0	7	1	B-D
23	1648	77	0	7	1	B-D
23	1649	77	0	7	1	B-D
23	1650	77	0	7	1	B-D
23	1651	77	0	7	1	B-D
23	1652	77	0	7	1	B-D
23	1653	77	0	7	1	B-D
23	1654	77	0	7	1	B-D
23	1655	77	0	7	1	B-D
23	1656	77	0	7	1	B-D
23	1657	77	0	7	1	B-D
23	1658	77	0	7	1	B-D
23	1659	77	0	7	1	B-D
23	1660	77	0	7	1	B-D
23	1661	77	0	7	1	B-D
23	1662	77	0	7	1	B-D
23	1663	77	0	7	1	B-D
23	1664	77	0	7	1	B-D
23	1665	77	0	7	1	B-D
23	1666	77	0	7	1	B-D
23	1667	77	0	7	1	B-D
23	1668	77	0	7	1	B-D
23	1669	77	0	7	1	B-D
23	1670	77	0	7	1	B-D
23	1671	77	0	7	1	B-D
23	1672	77	0	7	1	B-D
23	1673	77	0	7	1	B-D
23	1674	77	0	7	1	B-D
23	1675	77	0	7	1	B-D
23	1676	77	0	7	1	B-D
23	1677	77	0	7	1	B-D
23	1678	77	0	7	1	B-D
23	1679	77	0	7	1	B-D
23	1680	77	0	7	1	B-D
23	1681	77	0	8	0	B-D
23	1682	77	0	8	0	B-D
23	1683	77	0	8	0	B-D
23	1684	77	0	8	0	B-D
23	1685	77	0	8	0	B-D
23	1686	77	0	8	0	B-D
23	1687	77	0	8	0	B-D
23	1688	77	0	8	0	B-D
23	1689	77	0	8	0	B-D
23	1690	77	0	8	0	B-D
23	1691	77	0	8	0	B-D
23	1692	77	0	8	0	B-D
23	1693	77	0	8	0	B-D
23	1694	77	0	8	0	B-D
23	1695	77	0	8	0	B-D
23	1696	77	0	8	0	B-D
23	1697	77	0	8	0	B-D
23	1698	77	0	8	0	B-D
23	1699	77	0	8	0	B-D
23	1700	77	0	8	0	B-D
23	1701	77	0	8	0	B-D
23	1702	77	0	8	0	B-D
23	1703	77	0	8	0	B-D
23	1704	77	0	8	0	B-D
23	1705	77	0	8	0	B-D
23	1706	77	0	8	0	B-D
23	1707	77	0	8	0	B-D
24	1708	69	10	3	1	B-D
24	1709	69	10	4	1	B-D
24	1710	69	10	5	1	B-D
24	1711	69	10	5	1	B-D
24	1712	69	10	5	1	B-D
24	1713	69	10	5	1	B-D
24	1714	69	10	5	1	B-D
24	1715	69	10	5	1	B-D
24	1716	69	10	5	1	B-D
24	1717	69	10	5	1	B-D
24	1718	69	10	5	1	B-D
24	1719	69	10	5	1	B-D
24	1720	69	10	5	1	B-D
24	1721	69	10	5	1	B-D
24	1722	69	10	5	1	B-D
24	1723	69	10	5	1	B-D
24	1724	69	10	5	1	B-D
24	1725	69	10	5	1	B-D
24	1726	69	10	8	0	B-D
24	1727	69	10	8	0	B-D
24	1728	69	10	8	0	B-D
24	1729	69	10	8	0	B-D
24	1730	69	10	8	0	B-D
24	1731	69	10	8	0	B-D
24	1732	69	10	8	0	B-D
24	1733	69	10	8	0	B-D
24	1734	69	10	8	0	B-D
24	1735	69	10	8	0	B-D
24	1736	69	10	8	0	B-D
24	1737	69	10	8	0	B-D
24	1738	69	10	8	0	B-D
24	1739	69	10	8	0	B-D
24	1740	69	10	8	0	B-D
24	1741	69	10	8	0	B-D
24	1742	69	10	8	0	B-D
24	1743	69	10	8	0	B-D
24	1744	69	10	8	0	B-D
24	1745	69	10	8	0	B-D
24	1746	69	10	8	0	B-D
24	1747	69	10	8	0	B-D
24	1748	69	10	8	0	B-D
24	1749	69	10	8	0	B-D
24	1750	69	10	8	0	B-D
24	1751	69	10	8	0	B-D
24	1752	69	10	8	0	B-D
24	1753	69	10	8	0	B-D
24	1754	69	10	8	0	B-D
24	1755	69	10	8	0	B-D
24	1756	69	10	8	0	B-D
24	1757	69	10	8	0	B-D
24	1758	69	10	8	0	B-D
24	1759	69	10	8	0	B-D
24	1760	69	10	8	0	B-D
24	1761	69	10	8	0	B-D
24	1762	69	10	8	0	B-D
24	1763	69	10	8	0	B-D
24	1764	69	10	8	0	B-D
24	1765	69	10	8	0	B-D
24	1766	69	10	8	0	B-D
24	1767	69	10	8	0	B-D
24	1768	69	10	8	0	B-D
24	1769	69	10	8	0	B-D
24	1770	69	10	8	0	B-D
24	1771	69	10	8	0	B-D
24	1772	69	10	8	0	B-D
24	1773	69	10	8	0	B-D
24	1774	69	10	8	0	B-D
24	1775	69	10	8	0	B-D
24	1776	69	10	8	0	B-D
25	1777	70	10	2	1	B-D
25	1778	70	10	7	1	B-D
25	1779	70	10	7	1	B-D
25	1780	70	10	7	1	B-D
25	1781	70	10	7	1	B-D
25	1782	70	10	7	1	B-D
25	1783	70	10	7	1	B-D
25	1784	70	10	7	1	B-D
25	1785	70	10	7	1	B-D
25	1786	70	10	8	0	B-D
25	1787	70	10	8	0	B-D
25	1788	70	10	8	0	B-D
25	1789	70	10	8	0	B-D
25	1790	70	10	8	0	B-D
25	1791	70	10	8	0	B-D
25	1792	70	10	8	0	B-D
25	1793	70	10	8	0	B-D
25	1794	70	10	8	0	B-D
25	1795	70	10	8	0	B-D
25	1796	70	10	8	0	B-D
25	1797	70	10	8	0	B-D
25	1798	70	10	8	0	B-D
25	1799	70	10	8	0	B-D
25	1800	70	10	8	0	B-D
25	1801	70	10	8	0	B-D
25	1802	70	10	8	0	B-D
25	1803	70	10	8	0	B-D
25	1804	70	10	8	0	B-D
25	1805	70	10	8	0	B-D
25	1806	70	10	8	0	B-D
25	1807	70	10	8	0	B-D
25	1808	70	10	8	0	B-D
25	1809	70	10	8	0	B-D
25	1810	70	10	8	0	B-D
25	1811	70	10	8	0	B-D
25	1812	70	10	8	0	B-D
25	1813	70	10	8	0	B-D
25	1814	70	10	8	0	B-D
25	1815	70	10	8	0	B-D
25	1816	70	10	8	0	B-D
25	1817	70	10	8	0	B-D
25	1818	70	10	8	0	B-D
25	1819	70	10	8	0	B-D
25	1820	70	10	8	0	B-D
25	1821	70	10	8	0	B-D
25	1822	70	10	8	0	B-D
25	1823	70	10	8	0	B-D
25	1824	70	10	8	0	B-D
25	1825	70	10	8	0	B-D
25	1826	70	10	8	0	B-D
25	1827	70	10	8	0	B-D
25	1828	70	10	8	0	B-D
25	1829	70	10	8	0	B-D
25	1830	70	10	8	0	B-D
25	1831	70	10	8	0	B-D
25	1832	70	10	8	0	B-D
25	1833	70	10	8	0	B-D
25	1834	70	10	8	0	B-D
25	1835	70	10	8	0	B-D
25	1836	70	10	8	0	B-D
25	1837	70	10	8	0	B-D
25	1838	70	10	8	0	B-D
25	1839	70	10	8	0	B-D
25	1840	70	10	8	0	B-D
25	1841	70	10	8	0	B-D
25	1842	70	10	8	0	B-D
25	1843	70	10	8	0	B-D
25	1844	70	10	8	0	B-D
25	1845	70	10	8	0	B-D
25	1846	70	10	8	0	B-D
26	1847	73	10	1	1	B-D
26	1848	73	10	5	1	B-D
26	1849	73	10	7	1	B-D
26	1850	73	10	8	0	B-D
26	1851	73	10	8	0	B-D
26	1852	73	10	8	0	B-D
26	1853	73	10	8	0	B-D
26	1854	73	10	8	0	B-D
26	1855	73	10	8	0	B-D
26	1856	73	10	8	0	B-D
26	1857	73	10	8	0	B-D
26	1858	73	10	8	0	B-D
26	1859	73	10	8	0	B-D
26	1860	73	10	8	0	B-D
26	1861	73	10	8	0	B-D
26	1862	73	10	8	0	B-D
26	1863	73	10	8	0	B-D
26	1864	73	10	8	0	B-D
26	1865	73	10	8	0	B-D
26	1866	73	10	8	0	B-D
26	1867	73	10	8	0	B-D
26	1868	73	10	8	0	B-D
26	1869	73	10	8	0	B-D
26	1870	73	10	8	0	B-D
26	1871	73	10	8	0	B-D
26	1872	73	10	8	0	B-D
26	1873	73	10	8	0	B-D
26	1874	73	10	8	0	B-D
26	1875	73	10	8	0	B-D
26	1876	73	10	8	0	B-D
26	1877	73	10	8	0	B-D
26	1878	73	10	8	0	B-D
26	1879	73	10	8	0	B-D
26	1880	73	10	8	0	B-D
26	1881	73	10	8	0	B-D
26	1882	73	10	8	0	B-D
26	1883	73	10	8	0	B-D
26	1884	73	10	8	0	B-D
26	1885	73	10	8	0	B-D
26	1886	73	10	8	0	B-D
26	1887	73	10	8	0	B-D
26	1888	73	10	8	0	B-D
26	1889	73	10	8	0	B-D
26	1890	73	10	8	0	B-D
26	1891	73	10	8	0	B-D
26	1892	73	10	8	0	B-D
26	1893	73	10	8	0	B-D
26	1894	73	10	8	0	B-D
26	1895	73	10	8	0	B-D
26	1896	73	10	8	0	B-D
26	1897	73	10	8	0	B-D
26	1898	73	10	8	0	B-D
26	1899	73	10	8	0	B-D
26	1900	73	10	8	0	B-D
26	1901	73	10	8	0	B-D
26	1902	73	10	8	0	B-D
26	1903	73	10	8	0	B-D
26	1904	73	10	8	0	B-D
26	1905	73	10	8	0	B-D
26	1906	73	10	8	0	B-D
26	1907	73	10	8	0	B-D
26	1908	73	10	8	0	B-D
26	1909	73	10	8	0	B-D
26	1910	73	10	8	0	B-D
26	1911	73	10	8	0	B-D
26	1912	73	10	8	0	B-D
26	1913	73	10	8	0	B-D
26	1914	73	10	8	0	B-D
26	1915	73	10	8	0	B-D
26	1916	73	10	8	0	B-D
26	1917	73	10	8	0	B-D
26	1918	73	10	8	0	B-D
26	1919	73	10	8	0	B-D
27	1920	74	1	3	1	B-D
27	1921	74	1	4	1	B-D
27	1922	74	1	5	1	B-D
27	1923	74	1	7	1	B-D
27	1924	74	1	7	1	B-D
27	1925	74	1	7	1	B-D
27	1926	74	1	7	1	B-D
27	1927	74	1	7	1	B-D
27	1928	74	1	7	1	B-D
27	1929	74	1	7	1	B-D
27	1930	74	1	7	1	B-D
27	1931	74	1	7	1	B-D
27	1932	74	1	7	1	B-D
27	1933	74	1	7	1	B-D
27	1934	74	1	7	1	B-D
27	1935	74	1	7	1	B-D
27	1936	74	1	7	1	B-D
27	1937	74	1	7	1	B-D
27	1938	74	1	7	1	B-D
27	1939	74	1	7	1	B-D
27	1940	74	1	7	1	B-D
27	1941	74	1	8	0	B-D
27	1942	74	1	8	0	B-D
27	1943	74	1	8	0	B-D
27	1944	74	1	8	0	B-D
27	1945	74	1	8	0	B-D
27	1946	74	1	8	0	B-D
27	1947	74	1	8	0	B-D
27	1948	74	1	8	0	B-D
27	1949	74	1	8	0	B-D
27	1950	74	1	8	0	B-D
27	1951	74	1	8	0	B-D
27	1952	74	1	8	0	B-D
27	1953	74	1	8	0	B-D
27	1954	74	1	8	0	B-D
27	1955	74	1	8	0	B-D
27	1956	74	1	8	0	B-D
27	1957	74	1	8	0	B-D
27	1958	74	1	8	0	B-D
27	1959	74	1	8	0	B-D
27	1960	74	1	8	0	B-D
27	1961	74	1	8	0	B-D
27	1962	74	1	8	0	B-D
27	1963	74	1	8	0	B-D
27	1964	74	1	8	0	B-D
27	1965	74	1	8	0	B-D
27	1966	74	1	8	0	B-D
27	1967	74	1	8	0	B-D
27	1968	74	1	8	0	B-D
27	1969	74	1	8	0	B-D
27	1970	74	1	8	0	B-D
27	1971	74	1	8	0	B-D
27	1972	74	1	8	0	B-D
27	1973	74	1	8	0	B-D
27	1974	74	1	8	0	B-D
27	1975	74	1	8	0	B-D
27	1976	74	1	8	0	B-D
27	1977	74	1	8	0	B-D
27	1978	74	1	8	0	B-D
27	1979	74	1	8	0	B-D
27	1980	74	1	8	0	B-D
27	1981	74	1	8	0	B-D
27	1982	74	1	8	0	B-D
27	1983	74	1	8	0	B-D
27	1984	74	1	8	0	B-D
27	1985	74	1	8	0	B-D
27	1986	74	1	8	0	B-D
27	1987	74	1	8	0	B-D
27	1988	74	1	8	0	B-D
27	1989	74	1	8	0	B-D
27	1990	74	1	8	0	B-D
27	1991	74	1	8	0	B-D
27	1992	74	1	8	0	B-D
27	1993	74	1	8	0	B-D
28	1994	77	1	3	1	B-D
28	1995	77	1	5	1	B-D
28	1996	77	1	6	1	B-D
28	1997	77	1	8	0	B-D
28	1998	77	1	8	0	B-D
28	1999	77	1	8	0	B-D
28	2000	77	1	8	0	B-D
28	2001	77	1	8	0	B-D
28	2002	77	1	8	0	B-D
28	2003	77	1	8	0	B-D
28	2004	77	1	8	0	B-D
28	2005	77	1	8	0	B-D
28	2006	77	1	8	0	B-D
28	2007	77	1	8	0	B-D
28	2008	77	1	8	0	B-D
28	2009	77	1	8	0	B-D
28	2010	77	1	8	0	B-D
28	2011	77	1	8	0	B-D
28	2012	77	1	8	0	B-D
28	2013	77	1	8	0	B-D
28	2014	77	1	8	0	B-D
28	2015	77	1	8	0	B-D
28	2016	77	1	8	0	B-D
28	2017	77	1	8	0	B-D
28	2018	77	1	8	0	B-D
28	2019	77	1	8	0	B-D
28	2020	77	1	8	0	B-D
28	2021	77	1	8	0	B-D
28	2022	77	1	8	0	B-D
28	2023	77	1	8	0	B-D
28	2024	77	1	8	0	B-D
28	2025	77	1	8	0	B-D
28	2026	77	1	8	0	B-D
28	2027	77	1	8	0	B-D
28	2028	77	1	8	0	B-D
28	2029	77	1	8	0	B-D
28	2030	77	1	8	0	B-D
28	2031	77	1	8	0	B-D
28	2032	77	1	8	0	B-D
28	2033	77	1	8	0	B-D
28	2034	77	1	8	0	B-D
28	2035	77	1	8	0	B-D
28	2036	77	1	8	0	B-D
28	2037	77	1	8	0	B-D
28	2038	77	1	8	0	B-D
28	2039	77	1	8	0	B-D
28	2040	77	1	8	0	B-D
28	2041	77	1	8	0	B-D
28	2042	77	1	8	0	B-D
28	2043	77	1	8	0	B-D
28	2044	77	1	8	0	B-D
28	2045	77	1	8	0	B-D
28	2046	77	1	8	0	B-D
28	2047	77	1	8	0	B-D
28	2048	77	1	8	0	B-D
28	2049	77	1	8	0	B-D
28	2050	77	1	8	0	B-D
28	2051	77	1	8	0	B-D
28	2052	77	1	8	0	B-D
28	2053	77	1	8	0	B-D
28	2054	77	1	8	0	B-D
28	2055	77	1	8	0	B-D
28	2056	77	1	8	0	B-D
28	2057	77	1	8	0	B-D
28	2058	77	1	8	0	B-D
28	2059	77	1	8	0	B-D
28	2060	77	1	8	0	B-D
28	2061	77	1	8	0	B-D
28	2062	77	1	8	0	B-D
28	2063	77	1	8	0	B-D
28	2064	77	1	8	0	B-D
28	2065	77	1	8	0	B-D
28	2066	77	1	8	0	B-D
28	2067	77	1	8	0	B-D
28	2068	77	1	8	0	B-D
28	2069	77	1	8	0	B-D
28	2070	77	1	8	0	B-D
29	2071	68	1	1	1	B-D
29	2072	68	1	1	1	B-D
29	2073	68	1	1	1	B-D
29	2074	68	1	1	1	B-D
29	2075	68	1	1	1	B-D
29	2076	68	1	4	1	B-D
29	2077	68	1	5	1	B-D
29	2078	68	1	5	1	B-D
29	2079	68	1	5	1	B-D
29	2080	68	1	5	1	B-D
29	2081	68	1	5	1	B-D
29	2082	68	1	5	1	B-D
29	2083	68	1	5	1	B-D
29	2084	68	1	5	1	B-D
29	2085	68	1	5	1	B-D
29	2086	68	1	5	1	B-D
29	2087	68	1	5	1	B-D
29	2088	68	1	5	1	B-D
29	2089	68	1	5	1	B-D
29	2090	68	1	5	1	B-D
29	2091	68	1	5	1	B-D
29	2092	68	1	5	1	B-D
29	2093	68	1	5	1	B-D
29	2094	68	1	5	1	B-D
29	2095	68	1	5	1	B-D
29	2096	68	1	5	1	B-D
29	2097	68	1	5	1	B-D
29	2098	68	1	5	1	B-D
29	2099	68	1	5	1	B-D
29	2100	68	1	5	1	B-D
29	2101	68	1	5	1	B-D
29	2102	68	1	5	1	B-D
29	2103	68	1	5	1	B-D
29	2104	68	1	5	1	B-D
29	2105	68	1	5	1	B-D
29	2106	68	1	5	1	B-D
29	2107	68	1	5	1	B-D
29	2108	68	1	5	1	B-D
29	2109	68	1	5	1	B-D
29	2110	68	1	5	1	B-D
29	2111	68	1	5	1	B-D
29	2112	68	1	5	1	B-D
29	2113	68	1	5	1	B-D
29	2114	68	1	5	1	B-D
29	2115	68	1	5	1	B-D
29	2116	68	1	5	1	B-D
29	2117	68	1	5	1	B-D
29	2118	68	1	5	1	B-D
29	2119	68	1	5	1	B-D
29	2120	68	1	5	1	B-D
29	2121	68	1	6	1	B-D
29	2122	68	1	6	1	B-D
29	2123	68	1	6	1	B-D
29	2124	68	1	6	1	B-D
29	2125	68	1	6	1	B-D
29	2126	68	1	6	1	B-D
29	2127	68	1	6	1	B-D
29	2128	68	1	6	1	B-D
29	2129	68	1	6	1	B-D
29	2130	68	1	6	1	B-D
29	2131	68	1	6	1	B-D
29	2132	68	1	6	1	B-D
29	2133	68	1	6	1	B-D
29	2134	68	1	8	0	B-D
29	2135	68	1	8	0	B-D
29	2136	68	1	8	0	B-D
29	2137	68	1	8	0	B-D
29	2138	68	1	8	0	B-D
30	2139	77	0	2	1	B-D
30	2140	77	0	6	1	B-D
30	2141	77	0	7	1	B-D
30	2142	77	0	8	0	B-D
30	2143	77	0	8	0	B-D
30	2144	77	0	8	0	B-D
30	2145	77	0	8	0	B-D
30	2146	77	0	8	0	B-D
30	2147	77	0	8	0	B-D
30	2148	77	0	8	0	B-D
30	2149	77	0	8	0	B-D
30	2150	77	0	8	0	B-D
30	2151	77	0	8	0	B-D
30	2152	77	0	8	0	B-D
30	2153	77	0	8	0	B-D
30	2154	77	0	8	0	B-D
30	2155	77	0	8	0	B-D
30	2156	77	0	8	0	B-D
30	2157	77	0	8	0	B-D
30	2158	77	0	8	0	B-D
30	2159	77	0	8	0	B-D
30	2160	77	0	8	0	B-D
30	2161	77	0	8	0	B-D
30	2162	77	0	8	0	B-D
30	2163	77	0	8	0	B-D
30	2164	77	0	8	0	B-D
30	2165	77	0	8	0	B-D
30	2166	77	0	8	0	B-D
30	2167	77	0	8	0	B-D
30	2168	77	0	8	0	B-D
30	2169	77	0	8	0	B-D
30	2170	77	0	8	0	B-D
30	2171	77	0	8	0	B-D
30	2172	77	0	8	0	B-D
30	2173	77	0	8	0	B-D
30	2174	77	0	8	0	B-D
30	2175	77	0	8	0	B-D
30	2176	77	0	8	0	B-D
30	2177	77	0	8	0	B-D
30	2178	77	0	8	0	B-D
30	2179	77	0	8	0	B-D
30	2180	77	0	8	0	B-D
30	2181	77	0	8	0	B-D
30	2182	77	0	8	0	B-D
30	2183	77	0	8	0	B-D
30	2184	77	0	8	0	B-D
30	2185	77	0	8	0	B-D
30	2186	77	0	8	0	B-D
30	2187	77	0	8	0	B-D
30	2188	77	0	8	0	B-D
30	2189	77	0	8	0	B-D
30	2190	77	0	8	0	B-D
30	2191	77	0	8	0	B-D
30	2192	77	0	8	0	B-D
30	2193	77	0	8	0	B-D
30	2194	77	0	8	0	B-D
30	2195	77	0	8	0	B-D
30	2196	77	0	8	0	B-D
30	2197	77	0	8	0	B-D
30	2198	77	0	8	0	B-D
30	2199	77	0	8	0	B-D
30	2200	77	0	8	0	B-D
30	2201	77	0	8	0	B-D
30	2202	77	0	8	0	B-D
30	2203	77	0	8	0	B-D
30	2204	77	0	8	0	B-D
30	2205	77	0	8	0	B-D
30	2206	77	0	8	0	B-D
30	2207	77	0	8	0	B-D
30	2208	77	0	8	0	B-D
30	2209	77	0	8	0	B-D
30	2210	77	0	8	0	B-D
30	2211	77	0	8	0	B-D
30	2212	77	0	8	0	B-D
30	2213	77	0	8	0	B-D
30	2214	77	0	8	0	B-D
30	2215	77	0	8	0	B-D
31	2216	70	0	2	1	B-D
31	2217	70	0	2	1	B-D
31	2218	70	0	3	1	B-D
31	2219	70	0	8	0	B-D
31	2220	70	0	8	0	B-D
31	2221	70	0	8	0	B-D
31	2222	70	0	8	0	B-D
31	2223	70	0	8	0	B-D
31	2224	70	0	8	0	B-D
31	2225	70	0	8	0	B-D
31	2226	70	0	8	0	B-D
31	2227	70	0	8	0	B-D
31	2228	70	0	8	0	B-D
31	2229	70	0	8	0	B-D
31	2230	70	0	8	0	B-D
31	2231	70	0	8	0	B-D
31	2232	70	0	8	0	B-D
31	2233	70	0	8	0	B-D
31	2234	70	0	8	0	B-D
31	2235	70	0	8	0	B-D
31	2236	70	0	8	0	B-D
31	2237	70	0	8	0	B-D
31	2238	70	0	8	0	B-D
31	2239	70	0	8	0	B-D
31	2240	70	0	8	0	B-D
31	2241	70	0	8	0	B-D
31	2242	70	0	8	0	B-D
31	2243	70	0	8	0	B-D
31	2244	70	0	8	0	B-D
31	2245	70	0	8	0	B-D
31	2246	70	0	8	0	B-D
31	2247	70	0	8	0	B-D
31	2248	70	0	8	0	B-D
31	2249	70	0	8	0	B-D
31	2250	70	0	8	0	B-D
31	2251	70	0	8	0	B-D
31	2252	70	0	8	0	B-D
31	2253	70	0	8	0	B-D
31	2254	70	0	8	0	B-D
31	2255	70	0	8	0	B-D
31	2256	70	0	8	0	B-D
31	2257	70	0	8	0	B-D
31	2258	70	0	8	0	B-D
31	2259	70	0	8	0	B-D
31	2260	70	0	8	0	B-D
31	2261	70	0	8	0	B-D
31	2262	70	0	8	0	B-D
31	2263	70	0	8	0	B-D
31	2264	70	0	8	0	B-D
31	2265	70	0	8	0	B-D
31	2266	70	0	8	0	B-D
31	2267	70	0	8	0	B-D
31	2268	70	0	8	0	B-D
31	2269	70	0	8	0	B-D
31	2270	70	0	8	0	B-D
31	2271	70	0	8	0	B-D
31	2272	70	0	8	0	B-D
31	2273	70	0	8	0	B-D
31	2274	70	0	8	0	B-D
31	2275	70	0	8	0	B-D
31	2276	70	0	8	0	B-D
31	2277	70	0	8	0	B-D
31	2278	70	0	8	0	B-D
31	2279	70	0	8	0	B-D
31	2280	70	0	8	0	B-D
31	2281	70	0	8	0	B-D
31	2282	70	0	8	0	B-D
31	2283	70	0	8	0	B-D
31	2284	70	0	8	0	B-D
31	2285	70	0	8	0	B-D
32	2286	70	0	2	1	B-D
32	2287	70	0	3	1	B-D
32	2288	70	0	8	0	B-D
32	2289	70	0	8	0	B-D
32	2290	70	0	8	0	B-D
32	2291	70	0	8	0	B-D
32	2292	70	0	8	0	B-D
32	2293	70	0	8	0	B-D
32	2294	70	0	8	0	B-D
32	2295	70	0	8	0	B-D
32	2296	70	0	8	0	B-D
32	2297	70	0	8	0	B-D
32	2298	70	0	8	0	B-D
32	2299	70	0	8	0	B-D
32	2300	70	0	8	0	B-D
32	2301	70	0	8	0	B-D
32	2302	70	0	8	0	B-D
32	2303	70	0	8	0	B-D
32	2304	70	0	8	0	B-D
32	2305	70	0	8	0	B-D
32	2306	70	0	8	0	B-D
32	2307	70	0	8	0	B-D
32	2308	70	0	8	0	B-D
32	2309	70	0	8	0	B-D
32	2310	70	0	8	0	B-D
32	2311	70	0	8	0	B-D
32	2312	70	0	8	0	B-D
32	2313	70	0	8	0	B-D
32	2314	70	0	8	0	B-D
32	2315	70	0	8	0	B-D
32	2316	70	0	8	0	B-D
32	2317	70	0	8	0	B-D
32	2318	70	0	8	0	B-D
32	2319	70	0	8	0	B-D
32	2320	70	0	8	0	B-D
32	2321	70	0	8	0	B-D
32	2322	70	0	8	0	B-D
32	2323	70	0	8	0	B-D
32	2324	70	0	8	0	B-D
32	2325	70	0	8	0	B-D
32	2326	70	0	8	0	B-D
32	2327	70	0	8	0	B-D
32	2328	70	0	8	0	B-D
32	2329	70	0	8	0	B-D
32	2330	70	0	8	0	B-D
32	2331	70	0	8	0	B-D
32	2332	70	0	8	0	B-D
32	2333	70	0	8	0	B-D
32	2334	70	0	8	0	B-D
32	2335	70	0	8	0	B-D
32	2336	70	0	8	0	B-D
32	2337	70	0	8	0	B-D
32	2338	70	0	8	0	B-D
32	2339	70	0	8	0	B-D
32	2340	70	0	8	0	B-D
32	2341	70	0	8	0	B-D
32	2342	70	0	8	0	B-D
32	2343	70	0	8	0	B-D
32	2344	70	0	8	0	B-D
32	2345	70	0	8	0	B-D
32	2346	70	0	8	0	B-D
32	2347	70	0	8	0	B-D
32	2348	70	0	8	0	B-D
32	2349	70	0	8	0	B-D
32	2350	70	0	8	0	B-D
32	2351	70	0	8	0	B-D
32	2352	70	0	8	0	B-D
32	2353	70	0	8	0	B-D
32	2354	70	0	8	0	B-D
32	2355	70	0	8	0	B-D
33	2356	73	0	2	1	B-D
33	2357	73	0	3	1	B-D
33	2358	73	0	3	1	B-D
33	2359	73	0	6	1	B-D
33	2360	73	0	8	0	B-D
33	2361	73	0	8	0	B-D
33	2362	73	0	8	0	B-D
33	2363	73	0	8	0	B-D
33	2364	73	0	8	0	B-D
33	2365	73	0	8	0	B-D
33	2366	73	0	8	0	B-D
33	2367	73	0	8	0	B-D
33	2368	73	0	8	0	B-D
33	2369	73	0	8	0	B-D
33	2370	73	0	8	0	B-D
33	2371	73	0	8	0	B-D
33	2372	73	0	8	0	B-D
33	2373	73	0	8	0	B-D
33	2374	73	0	8	0	B-D
33	2375	73	0	8	0	B-D
33	2376	73	0	8	0	B-D
33	2377	73	0	8	0	B-D
33	2378	73	0	8	0	B-D
33	2379	73	0	8	0	B-D
33	2380	73	0	8	0	B-D
33	2381	73	0	8	0	B-D
33	2382	73	0	8	0	B-D
33	2383	73	0	8	0	B-D
33	2384	73	0	8	0	B-D
33	2385	73	0	8	0	B-D
33	2386	73	0	8	0	B-D
33	2387	73	0	8	0	B-D
33	2388	73	0	8	0	B-D
33	2389	73	0	8	0	B-D
33	2390	73	0	8	0	B-D
33	2391	73	0	8	0	B-D
33	2392	73	0	8	0	B-D
33	2393	73	0	8	0	B-D
33	2394	73	0	8	0	B-D
33	2395	73	0	8	0	B-D
33	2396	73	0	8	0	B-D
33	2397	73	0	8	0	B-D
33	2398	73	0	8	0	B-D
33	2399	73	0	8	0	B-D
33	2400	73	0	8	0	B-D
33	2401	73	0	8	0	B-D
33	2402	73	0	8	0	B-D
33	2403	73	0	8	0	B-D
33	2404	73	0	8	0	B-D
33	2405	73	0	8	0	B-D
33	2406	73	0	8	0	B-D
33	2407	73	0	8	0	B-D
33	2408	73	0	8	0	B-D
33	2409	73	0	8	0	B-D
33	2410	73	0	8	0	B-D
33	2411	73	0	8	0	B-D
33	2412	73	0	8	0	B-D
33	2413	73	0	8	0	B-D
33	2414	73	0	8	0	B-D
33	2415	73	0	8	0	B-D
33	2416	73	0	8	0	B-D
33	2417	73	0	8	0	B-D
33	2418	73	0	8	0	B-D
33	2419	73	0	8	0	B-D
33	2420	73	0	8	0	B-D
33	2421	73	0	8	0	B-D
33	2422	73	0	8	0	B-D
33	2423	73	0	8	0	B-D
33	2424	73	0	8	0	B-D
33	2425	73	0	8	0	B-D
33	2426	73	0	8	0	B-D
33	2427	73	0	8	0	B-D
33	2428	73	0	8	0	B-D
34	2429	70	10	1	1	B-D
34	2430	70	10	1	1	B-D
34	2431	70	10	1	1	B-D
34	2432	70	10	1	1	B-D
34	2433	70	10	1	1	B-D
34	2434	70	10	1	1	B-D
34	2435	70	10	1	1	B-D
34	2436	70	10	1	1	B-D
34	2437	70	10	1	1	B-D
34	2438	70	10	5	1	B-D
34	2439	70	10	6	1	B-D
34	2440	70	10	7	1	B-D
34	2441	70	10	7	1	B-D
34	2442	70	10	7	1	B-D
34	2443	70	10	7	1	B-D
34	2444	70	10	7	1	B-D
34	2445	70	10	7	1	B-D
34	2446	70	10	7	1	B-D
34	2447	70	10	7	1	B-D
34	2448	70	10	7	1	B-D
34	2449	70	10	7	1	B-D
34	2450	70	10	7	1	B-D
34	2451	70	10	7	1	B-D
34	2452	70	10	7	1	B-D
34	2453	70	10	7	1	B-D
34	2454	70	10	8	0	B-D
34	2455	70	10	8	0	B-D
34	2456	70	10	8	0	B-D
34	2457	70	10	8	0	B-D
34	2458	70	10	8	0	B-D
34	2459	70	10	8	0	B-D
34	2460	70	10	8	0	B-D
34	2461	70	10	8	0	B-D
34	2462	70	10	8	0	B-D
34	2463	70	10	8	0	B-D
34	2464	70	10	8	0	B-D
34	2465	70	10	8	0	B-D
34	2466	70	10	8	0	B-D
34	2467	70	10	8	0	B-D
34	2468	70	10	8	0	B-D
34	2469	70	10	8	0	B-D
34	2470	70	10	8	0	B-D
34	2471	70	10	8	0	B-D
34	2472	70	10	8	0	B-D
34	2473	70	10	8	0	B-D
34	2474	70	10	8	0	B-D
34	2475	70	10	8	0	B-D
34	2476	70	10	8	0	B-D
34	2477	70	10	8	0	B-D
34	2478	70	10	8	0	B-D
34	2479	70	10	8	0	B-D
34	2480	70	10	8	0	B-D
34	2481	70	10	8	0	B-D
34	2482	70	10	8	0	B-D
34	2483	70	10	8	0	B-D
34	2484	70	10	8	0	B-D
34	2485	70	10	8	0	B-D
34	2486	70	10	8	0	B-D
34	2487	70	10	8	0	B-D
34	2488	70	10	8	0	B-D
34	2489	70	10	8	0	B-D
34	2490	70	10	8	0	B-D
34	2491	70	10	8	0	B-D
34	2492	70	10	8	0	B-D
34	2493	70	10	8	0	B-D
34	2494	70	10	8	0	B-D
34	2495	70	10	8	0	B-D
34	2496	70	10	8	0	B-D
34	2497	70	10	8	0	B-D
34	2498	70	10	8	0	B-D
35	2499	75	10	1	1	B-D
35	2500	75	10	1	1	B-D
35	2501	75	10	1	1	B-D
35	2502	75	10	1	1	B-D
35	2503	75	10	1	1	B-D
35	2504	75	10	1	1	B-D
35	2505	75	10	1	1	B-D
35	2506	75	10	1	1	B-D
35	2507	75	10	1	1	B-D
35	2508	75	10	1	1	B-D
35	2509	75	10	1	1	B-D
35	2510	75	10	1	1	B-D
35	2511	75	10	1	1	B-D
35	2512	75	10	1	1	B-D
35	2513	75	10	1	1	B-D
35	2514	75	10	1	1	B-D
35	2515	75	10	1	1	B-D
35	2516	75	10	1	1	B-D
35	2517	75	10	1	1	B-D
35	2518	75	10	1	1	B-D
35	2519	75	10	1	1	B-D
35	2520	75	10	1	1	B-D
35	2521	75	10	2	1	B-D
35	2522	75	10	5	1	B-D
35	2523	75	10	8	0	B-D
35	2524	75	10	8	0	B-D
35	2525	75	10	8	0	B-D
35	2526	75	10	8	0	B-D
35	2527	75	10	8	0	B-D
35	2528	75	10	8	0	B-D
35	2529	75	10	8	0	B-D
35	2530	75	10	8	0	B-D
35	2531	75	10	8	0	B-D
35	2532	75	10	8	0	B-D
35	2533	75	10	8	0	B-D
35	2534	75	10	8	0	B-D
35	2535	75	10	8	0	B-D
35	2536	75	10	8	0	B-D
35	2537	75	10	8	0	B-D
35	2538	75	10	8	0	B-D
35	2539	75	10	8	0	B-D
35	2540	75	10	8	0	B-D
35	2541	75	10	8	0	B-D
35	2542	75	10	8	0	B-D
35	2543	75	10	8	0	B-D
35	2544	75	10	8	0	B-D
35	2545	75	10	8	0	B-D
35	2546	75	10	8	0	B-D
35	2547	75	10	8	0	B-D
35	2548	75	10	8	0	B-D
35	2549	75	10	8	0	B-D
35	2550	75	10	8	0	B-D
35	2551	75	10	8	0	B-D
35	2552	75	10	8	0	B-D
35	2553	75	10	8	0	B-D
35	2554	75	10	8	0	B-D
35	2555	75	10	8	0	B-D
35	2556	75	10	8	0	B-D
35	2557	75	10	8	0	B-D
35	2558	75	10	8	0	B-D
35	2559	75	10	8	0	B-D
35	2560	75	10	8	0	B-D
35	2561	75	10	8	0	B-D
35	2562	75	10	8	0	B-D
35	2563	75	10	8	0	B-D
35	2564	75	10	8	0	B-D
35	2565	75	10	8	0	B-D
35	2566	75	10	8	0	B-D
35	2567	75	10	8	0	B-D
35	2568	75	10	8	0	B-D
35	2569	75	10	8	0	B-D
35	2570	75	10	8	0	B-D
35	2571	75	10	8	0	B-D
35	2572	75	10	8	0	B-D
35	2573	75	10	8	0	B-D
36	2574	75	10	1	1	B-D
36	2575	75	10	1	1	B-D
36	2576	75	10	1	1	B-D
36	2577	75	10	1	1	B-D
36	2578	75	10	1	1	B-D
36	2579	75	10	1	1	B-D
36	2580	75	10	1	1	B-D
36	2581	75	10	1	1	B-D
36	2582	75	10	1	1	B-D
36	2583	75	10	2	1	B-D
36	2584	75	10	4	1	B-D
36	2585	75	10	5	1	B-D
36	2586	75	10	8	0	B-D
36	2587	75	10	8	0	B-D
36	2588	75	10	8	0	B-D
36	2589	75	10	8	0	B-D
36	2590	75	10	8	0	B-D
36	2591	75	10	8	0	B-D
36	2592	75	10	8	0	B-D
36	2593	75	10	8	0	B-D
36	2594	75	10	8	0	B-D
36	2595	75	10	8	0	B-D
36	2596	75	10	8	0	B-D
36	2597	75	10	8	0	B-D
36	2598	75	10	8	0	B-D
36	2599	75	10	8	0	B-D
36	2600	75	10	8	0	B-D
36	2601	75	10	8	0	B-D
36	2602	75	10	8	0	B-D
36	2603	75	10	8	0	B-D
36	2604	75	10	8	0	B-D
36	2605	75	10	8	0	B-D
36	2606	75	10	8	0	B-D
36	2607	75	10	8	0	B-D
36	2608	75	10	8	0	B-D
36	2609	75	10	8	0	B-D
36	2610	75	10	8	0	B-D
36	2611	75	10	8	0	B-D
36	2612	75	10	8	0	B-D
36	2613	75	10	8	0	B-D
36	2614	75	10	8	0	B-D
36	2615	75	10	8	0	B-D
36	2616	75	10	8	0	B-D
36	2617	75	10	8	0	B-D
36	2618	75	10	8	0	B-D
36	2619	75	10	8	0	B-D
36	2620	75	10	8	0	B-D
36	2621	75	10	8	0	B-D
36	2622	75	10	8	0	B-D
36	2623	75	10	8	0	B-D
36	2624	75	10	8	0	B-D
36	2625	75	10	8	0	B-D
36	2626	75	10	8	0	B-D
36	2627	75	10	8	0	B-D
36	2628	75	10	8	0	B-D
36	2629	75	10	8	0	B-D
36	2630	75	10	8	0	B-D
36	2631	75	10	8	0	B-D
36	2632	75	10	8	0	B-D
36	2633	75	10	8	0	B-D
36	2634	75	10	8	0	B-D
36	2635	75	10	8	0	B-D
36	2636	75	10	8	0	B-D
36	2637	75	10	8	0	B-D
36	2638	75	10	8	0	B-D
36	2639	75	10	8	0	B-D
36	2640	75	10	8	0	B-D
36	2641	75	10	8	0	B-D
36	2642	75	10	8	0	B-D
36	2643	75	10	8	0	B-D
36	2644	75	10	8	0	B-D
36	2645	75	10	8	0	B-D
36	2646	75	10	8	0	B-D
36	2647	75	10	8	0	B-D
36	2648	75	10	8	0	B-D
37	2649	72	1	1	1	B-D
37	2650	72	1	7	1	B-D
37	2651	72	1	7	1	B-D
37	2652	72	1	8	0	B-D
37	2653	72	1	8	0	B-D
37	2654	72	1	8	0	B-D
37	2655	72	1	8	0	B-D
37	2656	72	1	8	0	B-D
37	2657	72	1	8	0	B-D
37	2658	72	1	8	0	B-D
37	2659	72	1	8	0	B-D
37	2660	72	1	8	0	B-D
37	2661	72	1	8	0	B-D
37	2662	72	1	8	0	B-D
37	2663	72	1	8	0	B-D
37	2664	72	1	8	0	B-D
37	2665	72	1	8	0	B-D
37	2666	72	1	8	0	B-D
37	2667	72	1	8	0	B-D
37	2668	72	1	8	0	B-D
37	2669	72	1	8	0	B-D
37	2670	72	1	8	0	B-D
37	2671	72	1	8	0	B-D
37	2672	72	1	8	0	B-D
37	2673	72	1	8	0	B-D
37	2674	72	1	8	0	B-D
37	2675	72	1	8	0	B-D
37	2676	72	1	8	0	B-D
37	2677	72	1	8	0	B-D
37	2678	72	1	8	0	B-D
37	2679	72	1	8	0	B-D
37	2680	72	1	8	0	B-D
37	2681	72	1	8	0	B-D
37	2682	72	1	8	0	B-D
37	2683	72	1	8	0	B-D
37	2684	72	1	8	0	B-D
37	2685	72	1	8	0	B-D
37	2686	72	1	8	0	B-D
37	2687	72	1	8	0	B-D
37	2688	72	1	8	0	B-D
37	2689	72	1	8	0	B-D
37	2690	72	1	8	0	B-D
37	2691	72	1	8	0	B-D
37	2692	72	1	8	0	B-D
37	2693	72	1	8	0	B-D
37	2694	72	1	8	0	B-D
37	2695	72	1	8	0	B-D
37	2696	72	1	8	0	B-D
37	2697	72	1	8	0	B-D
37	2698	72	1	8	0	B-D
37	2699	72	1	8	0	B-D
37	2700	72	1	8	0	B-D
37	2701	72	1	8	0	B-D
37	2702	72	1	8	0	B-D
37	2703	72	1	8	0	B-D
37	2704	72	1	8	0	B-D
37	2705	72	1	8	0	B-D
37	2706	72	1	8	0	B-D
37	2707	72	1	8	0	B-D
37	2708	72	1	8	0	B-D
37	2709	72	1	8	0	B-D
37	2710	72	1	8	0	B-D
37	2711	72	1	8	0	B-D
37	2712	72	1	8	0	B-D
37	2713	72	1	8	0	B-D
37	2714	72	1	8	0	B-D
37	2715	72	1	8	0	B-D
37	2716	72	1	8	0	B-D
37	2717	72	1	8	0	B-D
37	2718	72	1	8	0	B-D
37	2719	72	1	8	0	B-D
37	2720	72	1	8	0	B-D
38	2721	79	1	6	1	B-D
38	2722	79	1	6	1	B-D
38	2723	79	1	7	1	B-D
38	2724	79	1	8	0	B-D
38	2725	79	1	8	0	B-D
38	2726	79	1	8	0	B-D
38	2727	79	1	8	0	B-D
38	2728	79	1	8	0	B-D
38	2729	79	1	8	0	B-D
38	2730	79	1	8	0	B-D
38	2731	79	1	8	0	B-D
38	2732	79	1	8	0	B-D
38	2733	79	1	8	0	B-D
38	2734	79	1	8	0	B-D
38	2735	79	1	8	0	B-D
38	2736	79	1	8	0	B-D
38	2737	79	1	8	0	B-D
38	2738	79	1	8	0	B-D
38	2739	79	1	8	0	B-D
38	2740	79	1	8	0	B-D
38	2741	79	1	8	0	B-D
38	2742	79	1	8	0	B-D
38	2743	79	1	8	0	B-D
38	2744	79	1	8	0	B-D
38	2745	79	1	8	0	B-D
38	2746	79	1	8	0	B-D
38	2747	79	1	8	0	B-D
38	2748	79	1	8	0	B-D
38	2749	79	1	8	0	B-D
38	2750	79	1	8	0	B-D
38	2751	79	1	8	0	B-D
38	2752	79	1	8	0	B-D
38	2753	79	1	8	0	B-D
38	2754	79	1	8	0	B-D
38	2755	79	1	8	0	B-D
38	2756	79	1	8	0	B-D
38	2757	79	1	8	0	B-D
38	2758	79	1	8	0	B-D
38	2759	79	1	8	0	B-D
38	2760	79	1	8	0	B-D
38	2761	79	1	8	0	B-D
38	2762	79	1	8	0	B-D
38	2763	79	1	8	0	B-D
38	2764	79	1	8	0	B-D
38	2765	79	1	8	0	B-D
38	2766	79	1	8	0	B-D
38	2767	79	1	8	0	B-D
38	2768	79	1	8	0	B-D
38	2769	79	1	8	0	B-D
38	2770	79	1	8	0	B-D
38	2771	79	1	8	0	B-D
38	2772	79	1	8	0	B-D
38	2773	79	1	8	0	B-D
38	2774	79	1	8	0	B-D
38	2775	79	1	8	0	B-D
38	2776	79	1	8	0	B-D
38	2777	79	1	8	0	B-D
38	2778	79	1	8	0	B-D
38	2779	79	1	8	0	B-D
38	2780	79	1	8	0	B-D
38	2781	79	1	8	0	B-D
38	2782	79	1	8	0	B-D
38	2783	79	1	8	0	B-D
38	2784	79	1	8	0	B-D
38	2785	79	1	8	0	B-D
38	2786	79	1	8	0	B-D
38	2787	79	1	8	0	B-D
38	2788	79	1	8	0	B-D
38	2789	79	1	8	0	B-D
38	2790	79	1	8	0	B-D
38	2791	79	1	8	0	B-D
38	2792	79	1	8	0	B-D
38	2793	79	1	8	0	B-D
38	2794	79	1	8	0	B-D
38	2795	79	1	8	0	B-D
38	2796	79	1	8	0	B-D
38	2797	79	1	8	0	B-D
38	2798	79	1	8	0	B-D
38	2799	79	1	8	0	B-D
39	2800	64	1	2	1	B-D
39	2801	64	1	3	1	B-D
39	2802	64	1	6	1	B-D
39	2803	64	1	7	1	B-D
39	2804	64	1	8	0	B-D
39	2805	64	1	8	0	B-D
39	2806	64	1	8	0	B-D
39	2807	64	1	8	0	B-D
39	2808	64	1	8	0	B-D
39	2809	64	1	8	0	B-D
39	2810	64	1	8	0	B-D
39	2811	64	1	8	0	B-D
39	2812	64	1	8	0	B-D
39	2813	64	1	8	0	B-D
39	2814	64	1	8	0	B-D
39	2815	64	1	8	0	B-D
39	2816	64	1	8	0	B-D
39	2817	64	1	8	0	B-D
39	2818	64	1	8	0	B-D
39	2819	64	1	8	0	B-D
39	2820	64	1	8	0	B-D
39	2821	64	1	8	0	B-D
39	2822	64	1	8	0	B-D
39	2823	64	1	8	0	B-D
39	2824	64	1	8	0	B-D
39	2825	64	1	8	0	B-D
39	2826	64	1	8	0	B-D
39	2827	64	1	8	0	B-D
39	2828	64	1	8	0	B-D
39	2829	64	1	8	0	B-D
39	2830	64	1	8	0	B-D
39	2831	64	1	8	0	B-D
39	2832	64	1	8	0	B-D
39	2833	64	1	8	0	B-D
39	2834	64	1	8	0	B-D
39	2835	64	1	8	0	B-D
39	2836	64	1	8	0	B-D
39	2837	64	1	8	0	B-D
39	2838	64	1	8	0	B-D
39	2839	64	1	8	0	B-D
39	2840	64	1	8	0	B-D
39	2841	64	1	8	0	B-D
39	2842	64	1	8	0	B-D
39	2843	64	1	8	0	B-D
39	2844	64	1	8	0	B-D
39	2845	64	1	8	0	B-D
39	2846	64	1	8	0	B-D
39	2847	64	1	8	0	B-D
39	2848	64	1	8	0	B-D
39	2849	64	1	8	0	B-D
39	2850	64	1	8	0	B-D
39	2851	64	1	8	0	B-D
39	2852	64	1	8	0	B-D
39	2853	64	1	8	0	B-D
39	2854	64	1	8	0	B-D
39	2855	64	1	8	0	B-D
39	2856	64	1	8	0	B-D
39	2857	64	1	8	0	B-D
39	2858	64	1	8	0	B-D
39	2859	64	1	8	0	B-D
39	2860	64	1	8	0	B-D
39	2861	64	1	8	0	B-D
39	2862	64	1	8	0	B-D
39	2863	64	1	8	0	B-D
40	2864	71	1	1	1	B-D
40	2865	71	1	1	1	B-D
40	2866	71	1	1	1	B-D
40	2867	71	1	1	1	B-D
40	2868	71	1	1	1	B-D
40	2869	71	1	1	1	B-D
40	2870	71	1	1	1	B-D
40	2871	71	1	1	1	B-D
40	2872	71	1	1	1	B-D
40	2873	71	1	1	1	B-D
40	2874	71	1	1	1	B-D
40	2875	71	1	1	1	B-D
40	2876	71	1	1	1	B-D
40	2877	71	1	1	1	B-D
40	2878	71	1	1	1	B-D
40	2879	71	1	1	1	B-D
40	2880	71	1	1	1	B-D
40	2881	71	1	1	1	B-D
40	2882	71	1	4	1	B-D
40	2883	71	1	4	1	B-D
40	2884	71	1	8	0	B-D
40	2885	71	1	8	0	B-D
40	2886	71	1	8	0	B-D
40	2887	71	1	8	0	B-D
40	2888	71	1	8	0	B-D
40	2889	71	1	8	0	B-D
40	2890	71	1	8	0	B-D
40	2891	71	1	8	0	B-D
40	2892	71	1	8	0	B-D
40	2893	71	1	8	0	B-D
40	2894	71	1	8	0	B-D
40	2895	71	1	8	0	B-D
40	2896	71	1	8	0	B-D
40	2897	71	1	8	0	B-D
40	2898	71	1	8	0	B-D
40	2899	71	1	8	0	B-D
40	2900	71	1	8	0	B-D
40	2901	71	1	8	0	B-D
40	2902	71	1	8	0	B-D
40	2903	71	1	8	0	B-D
40	2904	71	1	8	0	B-D
40	2905	71	1	8	0	B-D
40	2906	71	1	8	0	B-D
40	2907	71	1	8	0	B-D
40	2908	71	1	8	0	B-D
40	2909	71	1	8	0	B-D
40	2910	71	1	8	0	B-D
40	2911	71	1	8	0	B-D
40	2912	71	1	8	0	B-D
40	2913	71	1	8	0	B-D
40	2914	71	1	8	0	B-D
40	2915	71	1	8	0	B-D
40	2916	71	1	8	0	B-D
40	2917	71	1	8	0	B-D
40	2918	71	1	8	0	B-D
40	2919	71	1	8	0	B-D
40	2920	71	1	8	0	B-D
40	2921	71	1	8	0	B-D
40	2922	71	1	8	0	B-D
40	2923	71	1	8	0	B-D
40	2924	71	1	8	0	B-D
40	2925	71	1	8	0	B-D
40	2926	71	1	8	0	B-D
40	2927	71	1	8	0	B-D
40	2928	71	1	8	0	B-D
40	2929	71	1	8	0	B-D
40	2930	71	1	8	0	B-D
40	2931	71	1	8	0	B-D
40	2932	71	1	8	0	B-D
40	2933	71	1	8	0	B-D
40	2934	71	1	8	0	B-D
41	2935	70	1	1	1	B-D
41	2936	70	1	2	1	B-D
41	2937	70	1	2	1	B-D
41	2938	70	1	2	1	B-D
41	2939	70	1	2	1	B-D
41	2940	70	1	2	1	B-D
41	2941	70	1	5	1	B-D
41	2942	70	1	5	1	B-D
41	2943	70	1	7	1	B-D
41	2944	70	1	7	1	B-D
41	2945	70	1	7	1	B-D
41	2946	70	1	7	1	B-D
41	2947	70	1	8	0	B-D
41	2948	70	1	8	0	B-D
41	2949	70	1	8	0	B-D
41	2950	70	1	8	0	B-D
41	2951	70	1	8	0	B-D
41	2952	70	1	8	0	B-D
41	2953	70	1	8	0	B-D
41	2954	70	1	8	0	B-D
41	2955	70	1	8	0	B-D
41	2956	70	1	8	0	B-D
41	2957	70	1	8	0	B-D
41	2958	70	1	8	0	B-D
41	2959	70	1	8	0	B-D
41	2960	70	1	8	0	B-D
41	2961	70	1	8	0	B-D
41	2962	70	1	8	0	B-D
41	2963	70	1	8	0	B-D
41	2964	70	1	8	0	B-D
41	2965	70	1	8	0	B-D
41	2966	70	1	8	0	B-D
41	2967	70	1	8	0	B-D
41	2968	70	1	8	0	B-D
41	2969	70	1	8	0	B-D
41	2970	70	1	8	0	B-D
41	2971	70	1	8	0	B-D
41	2972	70	1	8	0	B-D
41	2973	70	1	8	0	B-D
41	2974	70	1	8	0	B-D
41	2975	70	1	8	0	B-D
41	2976	70	1	8	0	B-D
41	2977	70	1	8	0	B-D
41	2978	70	1	8	0	B-D
41	2979	70	1	8	0	B-D
41	2980	70	1	8	0	B-D
41	2981	70	1	8	0	B-D
41	2982	70	1	8	0	B-D
41	2983	70	1	8	0	B-D
41	2984	70	1	8	0	B-D
41	2985	70	1	8	0	B-D
41	2986	70	1	8	0	B-D
41	2987	70	1	8	0	B-D
41	2988	70	1	8	0	B-D
41	2989	70	1	8	0	B-D
41	2990	70	1	8	0	B-D
41	2991	70	1	8	0	B-D
41	2992	70	1	8	0	B-D
41	2993	70	1	8	0	B-D
41	2994	70	1	8	0	B-D
41	2995	70	1	8	0	B-D
41	2996	70	1	8	0	B-D
41	2997	70	1	8	0	B-D
41	2998	70	1	8	0	B-D
41	2999	70	1	8	0	B-D
41	3000	70	1	8	0	B-D
41	3001	70	1	8	0	B-D
41	3002	70	1	8	0	B-D
41	3003	70	1	8	0	B-D
41	3004	70	1	8	0	B-D
61	4411	78	0	8	0	S-D
61	4412	78	0	8	0	S-D
61	4413	78	0	8	0	S-D
61	4414	78	0	8	0	S-D
61	4415	78	0	8	0	S-D
61	4416	78	0	8	0	S-D
61	4417	78	0	8	0	S-D
61	4418	78	0	8	0	S-D
61	4419	78	0	8	0	S-D
61	4420	78	0	8	0	S-D
61	4421	78	0	8	0	S-D
61	4422	78	0	8	0	S-D
61	4423	78	0	8	0	S-D
61	4424	78	0	8	0	S-D
61	4425	78	0	8	0	S-D
61	4426	78	0	8	0	S-D
61	4427	78	0	8	0	S-D
61	4428	78	0	8	0	S-D
61	4429	78	0	8	0	S-D
61	4430	78	0	8	0	S-D
61	4431	78	0	8	0	S-D
61	4432	78	0	8	0	S-D
61	4433	78	0	8	0	S-D
61	4434	78	0	8	0	S-D
61	4435	78	0	8	0	S-D
61	4436	78	0	8	0	S-D
61	4437	78	0	8	0	S-D
61	4438	78	0	8	0	S-D
61	4439	78	0	8	0	S-D
61	4440	78	0	8	0	S-D
61	4441	78	0	8	0	S-D
61	4442	78	0	8	0	S-D
61	4443	78	0	8	0	S-D
61	4444	78	0	8	0	S-D
61	4445	78	0	8	0	S-D
61	4446	78	0	8	0	S-D
61	4447	78	0	8	0	S-D
61	4448	78	0	8	0	S-D
61	4449	78	0	8	0	S-D
61	4450	78	0	8	0	S-D
61	4451	78	0	8	0	S-D
61	4452	78	0	8	0	S-D
61	4453	78	0	8	0	S-D
61	4454	78	0	8	0	S-D
61	4455	78	0	8	0	S-D
61	4456	78	0	8	0	S-D
61	4457	78	0	8	0	S-D
61	4458	78	0	8	0	S-D
61	4459	78	0	8	0	S-D
61	4460	78	0	8	0	S-D
61	4461	78	0	8	0	S-D
61	4462	78	0	8	0	S-D
61	4463	78	0	8	0	S-D
61	4464	78	0	8	0	S-D
61	4465	78	0	8	0	S-D
61	4466	78	0	8	0	S-D
61	4467	78	0	8	0	S-D
61	4468	78	0	8	0	S-D
61	4469	78	0	8	0	S-D
61	4470	78	0	8	0	S-D
61	4471	78	0	8	0	S-D
61	4472	78	0	8	0	S-D
61	4473	78	0	8	0	S-D
61	4474	78	0	8	0	S-D
61	4475	78	0	8	0	S-D
61	4476	78	0	8	0	S-D
61	4477	78	0	8	0	S-D
61	4478	78	0	8	0	S-D
61	4479	78	0	8	0	S-D
61	4480	78	0	8	0	S-D
61	4481	78	0	8	0	S-D
61	4482	78	0	8	0	S-D
61	4483	78	0	8	0	S-D
61	4484	78	0	8	0	S-D
61	4485	78	0	8	0	S-D
61	4486	78	0	8	0	S-D
61	4487	78	0	4	1	S-D
61	4488	78	0	1	1	S-D
62	4489	69	0	8	0	S-D
62	4490	69	0	8	0	S-D
62	4491	69	0	8	0	S-D
62	4492	69	0	8	0	S-D
62	4493	69	0	8	0	S-D
62	4494	69	0	8	0	S-D
62	4495	69	0	8	0	S-D
62	4496	69	0	8	0	S-D
62	4497	69	0	8	0	S-D
62	4498	69	0	8	0	S-D
62	4499	69	0	8	0	S-D
62	4500	69	0	8	0	S-D
62	4501	69	0	8	0	S-D
62	4502	69	0	8	0	S-D
62	4503	69	0	8	0	S-D
62	4504	69	0	8	0	S-D
62	4505	69	0	8	0	S-D
62	4506	69	0	8	0	S-D
62	4507	69	0	8	0	S-D
62	4508	69	0	8	0	S-D
62	4509	69	0	8	0	S-D
62	4510	69	0	8	0	S-D
62	4511	69	0	8	0	S-D
62	4512	69	0	8	0	S-D
62	4513	69	0	8	0	S-D
62	4514	69	0	8	0	S-D
62	4515	69	0	8	0	S-D
62	4516	69	0	8	0	S-D
62	4517	69	0	8	0	S-D
62	4518	69	0	8	0	S-D
62	4519	69	0	8	0	S-D
62	4520	69	0	8	0	S-D
62	4521	69	0	8	0	S-D
62	4522	69	0	8	0	S-D
62	4523	69	0	8	0	S-D
62	4524	69	0	8	0	S-D
62	4525	69	0	8	0	S-D
62	4526	69	0	8	0	S-D
62	4527	69	0	8	0	S-D
62	4528	69	0	8	0	S-D
62	4529	69	0	8	0	S-D
62	4530	69	0	8	0	S-D
62	4531	69	0	8	0	S-D
62	4532	69	0	8	0	S-D
62	4533	69	0	8	0	S-D
62	4534	69	0	8	0	S-D
62	4535	69	0	8	0	S-D
62	4536	69	0	8	0	S-D
62	4537	69	0	8	0	S-D
62	4538	69	0	8	0	S-D
62	4539	69	0	8	0	S-D
62	4540	69	0	8	0	S-D
62	4541	69	0	8	0	S-D
62	4542	69	0	8	0	S-D
62	4543	69	0	8	0	S-D
62	4544	69	0	8	0	S-D
62	4545	69	0	8	0	S-D
62	4546	69	0	8	0	S-D
62	4547	69	0	8	0	S-D
62	4548	69	0	8	0	S-D
62	4549	69	0	8	0	S-D
62	4550	69	0	8	0	S-D
62	4551	69	0	8	0	S-D
62	4552	69	0	8	0	S-D
62	4553	69	0	8	0	S-D
62	4554	69	0	8	0	S-D
62	4555	69	0	8	0	S-D
62	4556	69	0	8	0	S-D
62	4557	69	0	8	0	S-D
63	4558	70	10	8	0	S-D
63	4559	70	10	8	0	S-D
63	4560	70	10	8	0	S-D
63	4561	70	10	8	0	S-D
63	4562	70	10	8	0	S-D
63	4563	70	10	8	0	S-D
63	4564	70	10	8	0	S-D
63	4565	70	10	8	0	S-D
63	4566	70	10	8	0	S-D
63	4567	70	10	8	0	S-D
63	4568	70	10	8	0	S-D
63	4569	70	10	8	0	S-D
63	4570	70	10	8	0	S-D
63	4571	70	10	8	0	S-D
63	4572	70	10	8	0	S-D
63	4573	70	10	8	0	S-D
63	4574	70	10	8	0	S-D
63	4575	70	10	8	0	S-D
63	4576	70	10	8	0	S-D
63	4577	70	10	8	0	S-D
63	4578	70	10	8	0	S-D
63	4579	70	10	8	0	S-D
63	4580	70	10	8	0	S-D
63	4581	70	10	8	0	S-D
63	4582	70	10	8	0	S-D
63	4583	70	10	8	0	S-D
63	4584	70	10	8	0	S-D
63	4585	70	10	8	0	S-D
63	4586	70	10	8	0	S-D
63	4587	70	10	8	0	S-D
63	4588	70	10	8	0	S-D
63	4589	70	10	8	0	S-D
63	4590	70	10	8	0	S-D
63	4591	70	10	8	0	S-D
63	4592	70	10	8	0	S-D
63	4593	70	10	8	0	S-D
63	4594	70	10	8	0	S-D
63	4595	70	10	8	0	S-D
63	4596	70	10	8	0	S-D
63	4597	70	10	8	0	S-D
63	4598	70	10	8	0	S-D
63	4599	70	10	8	0	S-D
63	4600	70	10	8	0	S-D
63	4601	70	10	8	0	S-D
63	4602	70	10	8	0	S-D
63	4603	70	10	8	0	S-D
63	4604	70	10	8	0	S-D
63	4605	70	10	8	0	S-D
63	4606	70	10	8	0	S-D
63	4607	70	10	8	0	S-D
63	4608	70	10	8	0	S-D
63	4609	70	10	8	0	S-D
63	4610	70	10	8	0	S-D
63	4611	70	10	8	0	S-D
63	4612	70	10	8	0	S-D
63	4613	70	10	8	0	S-D
63	4614	70	10	8	0	S-D
63	4615	70	10	8	0	S-D
63	4616	70	10	8	0	S-D
63	4617	70	10	8	0	S-D
63	4618	70	10	8	0	S-D
63	4619	70	10	8	0	S-D
63	4620	70	10	8	0	S-D
63	4621	70	10	8	0	S-D
63	4622	70	10	8	0	S-D
63	4623	70	10	8	0	S-D
63	4624	70	10	8	0	S-D
63	4625	70	10	8	0	S-D
63	4626	70	10	6	1	S-D
63	4627	70	10	1	1	S-D
64	4628	72	10	8	0	S-D
64	4629	72	10	8	0	S-D
64	4630	72	10	8	0	S-D
64	4631	72	10	8	0	S-D
64	4632	72	10	8	0	S-D
64	4633	72	10	8	0	S-D
64	4634	72	10	8	0	S-D
64	4635	72	10	8	0	S-D
64	4636	72	10	8	0	S-D
64	4637	72	10	8	0	S-D
64	4638	72	10	8	0	S-D
64	4639	72	10	8	0	S-D
64	4640	72	10	8	0	S-D
64	4641	72	10	8	0	S-D
64	4642	72	10	8	0	S-D
64	4643	72	10	8	0	S-D
64	4644	72	10	8	0	S-D
64	4645	72	10	8	0	S-D
64	4646	72	10	8	0	S-D
64	4647	72	10	8	0	S-D
64	4648	72	10	8	0	S-D
64	4649	72	10	8	0	S-D
64	4650	72	10	8	0	S-D
64	4651	72	10	8	0	S-D
64	4652	72	10	8	0	S-D
64	4653	72	10	8	0	S-D
64	4654	72	10	8	0	S-D
64	4655	72	10	8	0	S-D
64	4656	72	10	8	0	S-D
64	4657	72	10	8	0	S-D
64	4658	72	10	8	0	S-D
64	4659	72	10	8	0	S-D
64	4660	72	10	8	0	S-D
64	4661	72	10	8	0	S-D
64	4662	72	10	8	0	S-D
64	4663	72	10	8	0	S-D
64	4664	72	10	8	0	S-D
64	4665	72	10	8	0	S-D
64	4666	72	10	8	0	S-D
64	4667	72	10	8	0	S-D
64	4668	72	10	8	0	S-D
64	4669	72	10	8	0	S-D
64	4670	72	10	8	0	S-D
64	4671	72	10	8	0	S-D
64	4672	72	10	8	0	S-D
64	4673	72	10	8	0	S-D
64	4674	72	10	8	0	S-D
64	4675	72	10	8	0	S-D
64	4676	72	10	8	0	S-D
64	4677	72	10	8	0	S-D
64	4678	72	10	8	0	S-D
64	4679	72	10	8	0	S-D
64	4680	72	10	8	0	S-D
64	4681	72	10	8	0	S-D
64	4682	72	10	8	0	S-D
64	4683	72	10	8	0	S-D
64	4684	72	10	8	0	S-D
64	4685	72	10	8	0	S-D
64	4686	72	10	8	0	S-D
64	4687	72	10	8	0	S-D
64	4688	72	10	8	0	S-D
64	4689	72	10	8	0	S-D
64	4690	72	10	8	0	S-D
64	4691	72	10	8	0	S-D
64	4692	72	10	8	0	S-D
64	4693	72	10	8	0	S-D
64	4694	72	10	8	0	S-D
64	4695	72	10	8	0	S-D
64	4696	72	10	8	0	S-D
64	4697	72	10	4	1	S-D
64	4698	72	10	4	1	S-D
64	4699	72	10	3	1	S-D
65	4700	81	10	8	0	S-D
65	4701	81	10	8	0	S-D
65	4702	81	10	8	0	S-D
65	4703	81	10	8	0	S-D
65	4704	81	10	8	0	S-D
65	4705	81	10	8	0	S-D
65	4706	81	10	8	0	S-D
65	4707	81	10	8	0	S-D
65	4708	81	10	8	0	S-D
65	4709	81	10	8	0	S-D
65	4710	81	10	8	0	S-D
65	4711	81	10	8	0	S-D
65	4712	81	10	8	0	S-D
65	4713	81	10	8	0	S-D
65	4714	81	10	8	0	S-D
65	4715	81	10	8	0	S-D
65	4716	81	10	8	0	S-D
65	4717	81	10	8	0	S-D
65	4718	81	10	8	0	S-D
65	4719	81	10	8	0	S-D
65	4720	81	10	8	0	S-D
65	4721	81	10	8	0	S-D
65	4722	81	10	8	0	S-D
65	4723	81	10	8	0	S-D
65	4724	81	10	8	0	S-D
65	4725	81	10	8	0	S-D
65	4726	81	10	8	0	S-D
65	4727	81	10	8	0	S-D
65	4728	81	10	8	0	S-D
65	4729	81	10	8	0	S-D
65	4730	81	10	8	0	S-D
65	4731	81	10	8	0	S-D
65	4732	81	10	8	0	S-D
65	4733	81	10	8	0	S-D
65	4734	81	10	8	0	S-D
65	4735	81	10	8	0	S-D
65	4736	81	10	8	0	S-D
65	4737	81	10	8	0	S-D
65	4738	81	10	8	0	S-D
65	4739	81	10	8	0	S-D
65	4740	81	10	8	0	S-D
65	4741	81	10	8	0	S-D
65	4742	81	10	8	0	S-D
65	4743	81	10	8	0	S-D
65	4744	81	10	8	0	S-D
65	4745	81	10	8	0	S-D
65	4746	81	10	8	0	S-D
65	4747	81	10	8	0	S-D
65	4748	81	10	8	0	S-D
65	4749	81	10	8	0	S-D
65	4750	81	10	8	0	S-D
65	4751	81	10	8	0	S-D
65	4752	81	10	8	0	S-D
65	4753	81	10	8	0	S-D
65	4754	81	10	8	0	S-D
65	4755	81	10	8	0	S-D
65	4756	81	10	8	0	S-D
65	4757	81	10	8	0	S-D
65	4758	81	10	8	0	S-D
65	4759	81	10	8	0	S-D
65	4760	81	10	8	0	S-D
65	4761	81	10	8	0	S-D
65	4762	81	10	8	0	S-D
65	4763	81	10	8	0	S-D
65	4764	81	10	8	0	S-D
65	4765	81	10	8	0	S-D
65	4766	81	10	8	0	S-D
65	4767	81	10	8	0	S-D
65	4768	81	10	8	0	S-D
65	4769	81	10	8	0	S-D
65	4770	81	10	8	0	S-D
65	4771	81	10	8	0	S-D
65	4772	81	10	8	0	S-D
65	4773	81	10	8	0	S-D
65	4774	81	10	8	0	S-D
65	4775	81	10	8	0	S-D
65	4776	81	10	8	0	S-D
65	4777	81	10	5	1	S-D
65	4778	81	10	4	1	S-D
65	4779	81	10	2	1	S-D
65	4780	81	10	1	1	S-D
66	4781	72	1	8	0	S-D
66	4782	72	1	8	0	S-D
66	4783	72	1	8	0	S-D
66	4784	72	1	8	0	S-D
66	4785	72	1	8	0	S-D
66	4786	72	1	8	0	S-D
66	4787	72	1	8	0	S-D
66	4788	72	1	8	0	S-D
66	4789	72	1	8	0	S-D
66	4790	72	1	8	0	S-D
66	4791	72	1	8	0	S-D
66	4792	72	1	8	0	S-D
66	4793	72	1	8	0	S-D
66	4794	72	1	8	0	S-D
66	4795	72	1	8	0	S-D
66	4796	72	1	8	0	S-D
66	4797	72	1	8	0	S-D
66	4798	72	1	8	0	S-D
66	4799	72	1	8	0	S-D
66	4800	72	1	8	0	S-D
66	4801	72	1	8	0	S-D
66	4802	72	1	8	0	S-D
66	4803	72	1	8	0	S-D
66	4804	72	1	8	0	S-D
66	4805	72	1	8	0	S-D
66	4806	72	1	8	0	S-D
66	4807	72	1	8	0	S-D
66	4808	72	1	8	0	S-D
66	4809	72	1	8	0	S-D
66	4810	72	1	8	0	S-D
66	4811	72	1	8	0	S-D
66	4812	72	1	8	0	S-D
66	4813	72	1	8	0	S-D
66	4814	72	1	8	0	S-D
66	4815	72	1	8	0	S-D
66	4816	72	1	8	0	S-D
66	4817	72	1	8	0	S-D
66	4818	72	1	8	0	S-D
66	4819	72	1	8	0	S-D
66	4820	72	1	8	0	S-D
66	4821	72	1	8	0	S-D
66	4822	72	1	8	0	S-D
66	4823	72	1	8	0	S-D
66	4824	72	1	8	0	S-D
66	4825	72	1	8	0	S-D
66	4826	72	1	8	0	S-D
66	4827	72	1	8	0	S-D
66	4828	72	1	8	0	S-D
66	4829	72	1	8	0	S-D
66	4830	72	1	8	0	S-D
66	4831	72	1	8	0	S-D
66	4832	72	1	8	0	S-D
66	4833	72	1	8	0	S-D
66	4834	72	1	8	0	S-D
66	4835	72	1	8	0	S-D
66	4836	72	1	8	0	S-D
66	4837	72	1	8	0	S-D
66	4838	72	1	8	0	S-D
66	4839	72	1	8	0	S-D
66	4840	72	1	8	0	S-D
66	4841	72	1	8	0	S-D
66	4842	72	1	8	0	S-D
66	4843	72	1	8	0	S-D
66	4844	72	1	8	0	S-D
66	4845	72	1	8	0	S-D
66	4846	72	1	8	0	S-D
66	4847	72	1	8	0	S-D
66	4848	72	1	8	0	S-D
66	4849	72	1	8	0	S-D
66	4850	72	1	8	0	S-D
66	4851	72	1	8	0	S-D
66	4852	72	1	8	0	S-D
67	4853	77	1	8	0	S-D
67	4854	77	1	8	0	S-D
67	4855	77	1	8	0	S-D
67	4856	77	1	8	0	S-D
67	4857	77	1	8	0	S-D
67	4858	77	1	8	0	S-D
67	4859	77	1	8	0	S-D
67	4860	77	1	8	0	S-D
67	4861	77	1	8	0	S-D
67	4862	77	1	8	0	S-D
67	4863	77	1	8	0	S-D
67	4864	77	1	8	0	S-D
[truncated: 586 more rows]
