# Supplementary material for: Young honey bees avoid consuming the pollen they recognize as pesticide-contaminated
Source: Research Square preprint supplement (doi:10.21203/rs.3.rs-7859079/v1), 2025-10-31
Supplement: Supplementary file 2 [file 875936bc07b83953d950e36b.docx]

**Supplementary Information**

**Survival in the GLY experiment**

**Table S1A. Statistical analysis of survival in the GLY experiment**. Number of bees (N), observed and expected deaths, and contribution to the log-rank test statistic ((O−E)²/V) for each treatment in the **GLY experiment**. The treatment groups consisted of honey bees exposed to one of three different concentrations of GLY (0 mg/l, 1.25 mg/l, 2.5 mg/l) combined with one of two combinations of pollen types (*B-D* series and *S-D* series). The log-rank test indicated significant differences in survival among groups (Chisq = 20.3, *p* = 0.001). Pairwise comparisons between concentrations within each pollen series are also shown.

| **Log-rank test** | *survdiff(Surv(time, status) ~ group, data)* | | | |
| --- | --- | --- | --- | --- |
| **Group** | **N** | **Observed** | **Expected** | **(O−E)^2/V** |
| 0 mg/l * *B-D* series | 481 | 49 | 40.70 | 2.05 |
| 1.25 mg/l * *B-D* series | 483 | 30 | 42.80 | 4.72 |
| 2.5 mg/l * *B-D* series | 495 | 32 | 43.70 | 3.90 |
| 0 mg/l * *S-D* series | 378 | 52 | 33.00 | 13.01 |
| 1.25 mg/l * *S-D* series | 487 | 39 | 42.30 | 0.31 |
| 2.5 mg/l * *S-D* series | 472 | 41 | 40.60 | 0.01 |
|  |  |  | ***Chisq*** | **20.30** |
|  |  |  | ***p*** | **0.001** |
| **Comparisons** | *pairwise_survdiff(Surv(time, status) ~ concentration, data = subset(data, serie =="****B-D series****"), p.adjust.method = "holm")* | | | |
|  |  |  |  | p-value |
| 0 mg/l - 1.25 mg/l |  |  |  | 0.058 |
| 0 mg/l - 2.5 mg/l |  |  |  | 0.058 |
| 1.25 mg/l - 2.5 mg/l |  |  |  | 0.861 |
| **Comparisons** | *pairwise_survdiff(Surv(time, status) ~ concentration, data = subset(data, serie =="****S-D series****"), p.adjust.method = "holm")* | | | |
|  |  |  |  | p-value |
| 0 mg/l - 1.25 mg/l |  |  |  | **0.027** |
| 0 mg/l - 2.5 mg/l |  |  |  | 0.057 |
| 1.25 mg/l - 2.5 mg/l |  |  |  | 0.689 |

**Survival in IMI experiment**

**Table S1B.** **Statistical analysis of survival the IMI experiment.** Number of bees (N), observed and expected deaths, and contribution to the log-rank test statistic ((O−E)²/V) for each treatment in **IMI experiment**. The treatment groups consisted of honey bees exposed to one of three different concentrations of IMI (0 µg/l, 1 µg/l, 10 µg/l) combined with one of two combinations of two pollen types (*B-D* series and *S-D* series). The log-rank test indicated significant differences in survival among groups (Chisq = 84.7, p < 0.001). Pairwise comparisons between concentrations within each pollen series are also shown in the table.

| **Log-rank test** | *survdiff(Surv(time, status) ~ group, data)* | | | |
| --- | --- | --- | --- | --- |
| **Group** | **N** | **Observed** | **Expected** | **(O−E)^2/V** |
| 0 µg/l * *B-D* series | 538 | 69 | 80.40 | 2.12 |
| 1 µg/l * *B-D* series | 575 | 129 | 80.10 | 39.26 |
| 10 µg/l * *B-D* series | 432 | 91 | 59.40 | 20.64 |
| 0 µg/l * *S-D* series | 304 | 16 | 45.30 | 22.27 |
| 1 µg/l * *S-D* series | 363 | 35 | 53.20 | 7.49 |
| 10 µg/l * *S-D* series | 373 | 33 | 54.60 | 10.36 |
|  |  |  | ***Chisq*** | **84.70** |
|  |  |  | ***p*** | **< 0.001** |
| **Comparisons** | *pairwise_survdiff(Surv(time, status) ~ concentration, data = subset(data, serie == "****B-D series****"), p.adjust.method = "holm")* | | | |
|  |  |  |  | p-value |
| 0 µg/l - 1 µg/l |  |  |  | **< 0.001** |
| 0 µg/l - 10 µg/l |  |  |  | **< 0.001** |
| 1 µg/l - 10 µg/l |  |  |  | 0.710 |
| **Comparisons** | *pairwise_survdiff(Surv(time, status) ~ concentration, data = subset(data, serie == "****S-D series****"), p.adjust.method = "holm")* | | | |
|  |  |  |  | p-value |
| 0 µg/l - 1 µg/l |  |  |  | 0.110 |
| 0 µg/l - 10 µg/l |  |  |  | 0.150 |
| 1 µg/l - 10 µg/l |  |  |  | 0.720 |

**Standardized consumption (SC) of pollen in the GLY and IMI experiment**

**Table S2.** Standardized consumption (mean ± SE) of pollen during the initial (Days 1-2), training (Days 3–4), and testing (Days 5–6) phases. Bee-cages contained 80 individuals of known age and were provided with either *B. napus* (*B-D* series) or *S. lorentzii* (*S-D* series) pollen with different concentrations of glyphosate (GLY: 0, 1.25, 2.5 mg/l) or imidacloprid (IMI: 0, 1, 10 µg/l) during the training phase.

|  |  | ***N*** | Standardized Consumption (SC) | | | | | |
| --- | --- | --- | --- | --- | --- | --- | --- | --- |
|  | Initial phase | | Training phase | | Testing phase | |
|  |  | **Day 1** | **Day 2** | **Day 3** | **Day 4** | **Day 5** | **Day 6** |
| **GLY experiment** | ***B-D series*** |  |  |  |  |  |  |  |
| 0 mg/l | *6* | 0.562±0.064 | 0.582±0.031 | 0.599±0.048 | 0.552±0.028 | 0.556±0.020 | 0.631±0.046 |
| 1.25 mg/l | *6* | 0.523±0.056 | 0.698±0.048 | 0.526±0.012 | 0.607±0.040 | 0.447±0.073 | 0.725±0.089 |
| 2.5 mg/l | *6* | 0.488±0.038 | 0.543±0.043 | 0.348±0.046 | 0.325±0.046 | 0.475±0.064 | 0.625±0.047 |
| ***S-D series*** |  |  |  |  |  |  |  |
| 0 mg/l | *6* | 0.545±0.060 | 0.514±0.090 | 0.486±0.043 | 0.629±0.077 | 0.455±0.021 | 0.625±0.105 |
| 1.25 mg/l | *6* | 0.539±0.059 | 0.740±0.068 | 0.524±0.024 | 0.457±0.033 | 0.512±0.012 | 0.477±0.060 |
| 2.5 mg/l | *6* | 0.569±0.059 | 0.661±0.055 | 0.512±0.034 | 0.435±0.033 | 0.504±0.044 | 0.561±0.107 |
| **IMI experiment** | ***B-D series*** |  |  | | | | | |
| 0 µg/l | *7* | 0.509±0.059 | 0.607±0.024 | 0.543±0.025 | 0.595±0.049 | 0.579±0.046 | 0.495±0.037 |
| 1 µg/l | *8* | 0.526±0.047 | 0.538±0.029 | 0.569±0.057 | 0.528±0.046 | 0.455±0.051 | 0.570±0.035 |
| 10 µg/l | *6* | 0.572±0.055 | 0.581±0.038 | 0.525±0.033 | 0.615±0.038 | 0.455±0.065 | 0.596±0.026 |
| ***S-D series*** |  |  |  |  |  |  |  |
| 0 µg/l | *4* | 0.457±0.025 | 0.673±0.060 | 0.557±0.021 | 0.524±0.085 | 0.493±0.046 | 0.471±0.072 |
| 1 µg/l | *5* | 0.511±0.032 | 0.553±0.063 | 0.474±0.071 | 0.683±0.028 | 0.357±0.030 | 0.412±0.027 |
| 10 µg/l | *5* | 0.448±0.048 | 0.670±0.024 | 0.573±0.032 | 0.341±0.041 | 0.355±0.019 | 0.648±0.033 |

**Consumption preferences in the GLY experiment**

**Table S3A.** **Statistical analysis of the consumption preferences in the GLY experiment.** Analysis of variance and *Post hoc* comparisons among concentrations for the linear mixed model proposed for testing the effect of GLY compound on young bees' consumption preferences. Values in bold represent p-values < 0.05.

| **ANOVA** | *SC ~ phase*concentration*pollen_identity + SC_initial_phase + total_consumption, random = ~ 1|cage* | | | | |
| --- | --- | --- | --- | --- | --- |
|  | | numDF | denDF | F-value | p-value |
|  | phase | 1 | 29 | 0.037 | 0.848 |
| concentration | 2 | 29 | 6.590 | **0.004** |
| pollen_identity | 1 | 29 | 0.112 | 0.741 |
|  | SC_initial_phase | 1 | 29 | 0.004 | 0.950 |
|  | total_consumption | 1 | 29 | 5.783 | **0.023** |
|  | phase*concentration | 2 | 29 | 2.785 | 0.078 |
|  | phase*pollen_identity | 1 | 29 | 0.004 | 0.948 |
|  | concentration*pollen_identity | 2 | 29 | 1.999 | 0.154 |
|  | phase*concentration*pollen_identity | 2 | 29 | 3.301 | 0.051 |
| **Comparisons** | *model, pairwise ~ concentration* | | | | |
|  |  | t-ratio | | | p-value |
|  | 0 mg/l - 1.25 mg/l | 1.690 | | | 0.226 |
|  | 0 mg/l - 2.5 mg/l | 3.722 | | | **0.002** |
|  | 1.25 mg/l - 2.5 mg/l | 2.010 | | | 0.128 |

**Consumption preferences in the IMI experiment**

**Table S3B.** **Statistical analysis of consumption preferences in the IMI experiment.** Analysis of variance and *Post hoc* comparisons among concentrations for the linear mixed model proposed for testing the effect of IMI compound on young bees' consumption preferences. Values in bold represent p-values < 0.05.

| **ANOVA** | *SC ~ phase*doses*pollen_identity + SC_initial_phase + w, random = ~ 1|cage* | | | | |
| --- | --- | --- | --- | --- | --- |
|  | | numDF | denDF | F-value | p-value |
|  | phase | 1 | 27 | 11.449 | **0.002** |
| concentration | 2 | 27 | 3.644 | **0.040** |
| pollen_identity | 1 | 27 | 8.366 | **0.007** |
|  | SC_initial_phase | 1 | 27 | 0.352 | 0.558 |
|  | total_consumption | 1 | 27 | 0.108 | 0.745 |
|  | phase*concentration | 2 | 27 | 2.079 | 0.145 |
|  | phase*pollen_identity | 1 | 27 | 0.036 | 0.851 |
|  | concentration*pollen_identity | 2 | 27 | 1.862 | 0.175 |
|  | phase*concentration*pollen_identity | 2 | 27 | 3.339 | 0.051 |
| **Comparisons** | *model, pairwise ~ concentration* | | | | |
|  |  | t-ratio | | | p-value |
|  | 0 µg/l - 1 µg/l | 1.573 | | | 0.274 |
|  | 0 µg/l - 10 µg/l | 2.553 | | | **0.043** |
|  | 1 µg/l - 10 µg/l | 1.017 | | | 0.573 |

**
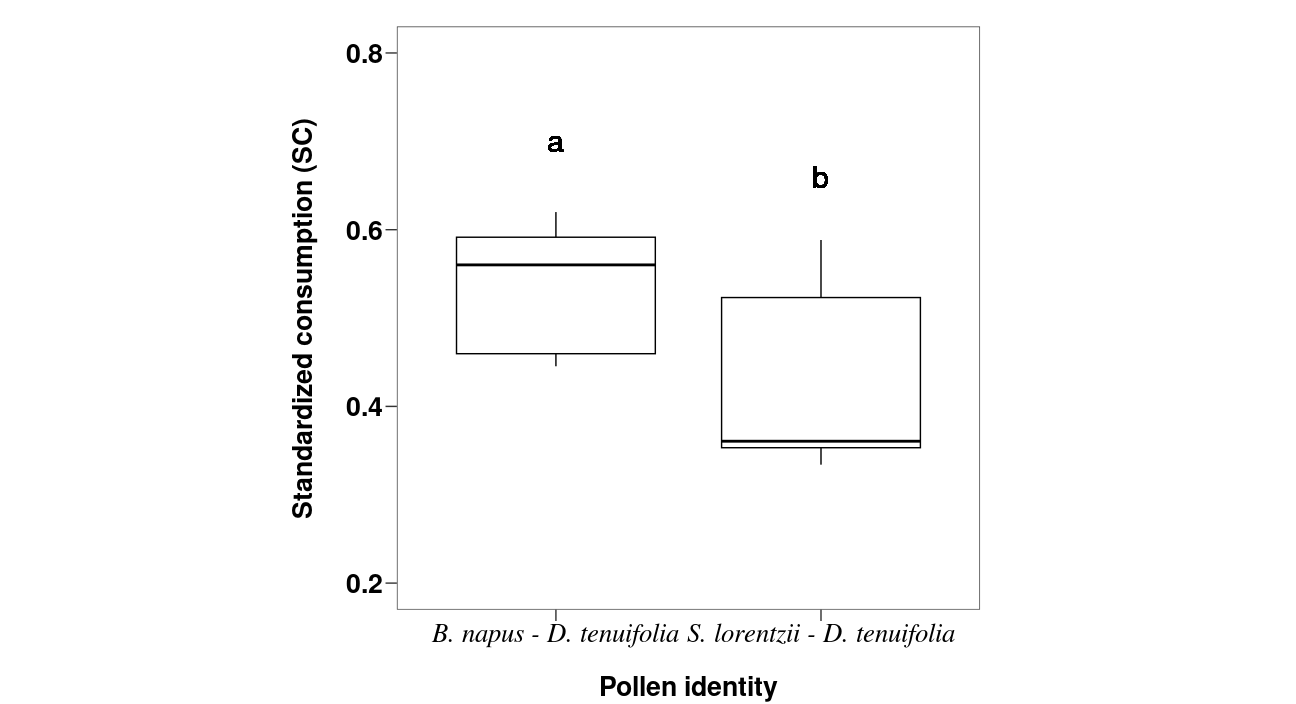
**

**Figure S1A**. **Effects of pollen identity on consumption preferences of young honey bee workers in IMI experiment.** Standardized consumption was obtained in caged bees that experienced either *B. napus* and *D. tenuifolia* pollen combination (*B-D* series) or *S. lorentzii* - *D. tenuifolia* (*S-D* series). The box plots show medians, quartiles, and 5th and 95th percentiles of the data predicted by LMM. Different letters indicate significant differences among doses (P < 0.05).


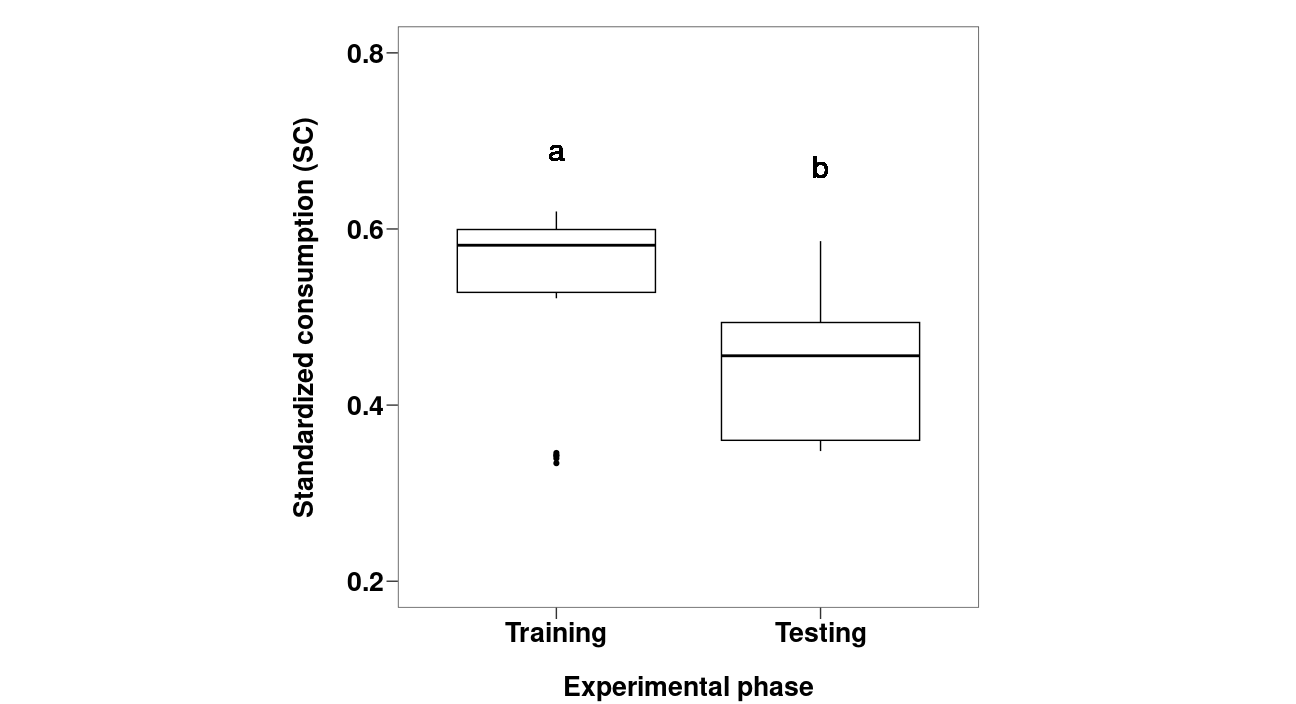


**Figure S1B.** **Effects of the experimental phase on pollen consumption preferences of young honey bee workers in the IMI experiment.** Standardized consumption (SC) was obtained during (training phase) or after (testing phase) caged bees experienced pollens contaminated with IMI. The box plots show medians, quartiles, and 5th and 95th percentiles of the data predicted by LMM. Different letters indicate significant differences among doses (P < 0.05).

**Total pollen consumption in the GLY experiment**

**Table S4A. Statistical analysis of total pollen consumption in the GLY experiment.** Analysis of variance and *Post hoc* comparisons among concentrations for the general linear model proposed for testing the effect of GLY compound on young bees' total pollen consumption. Values in bold represent p-values < 0.05.

| **ANOVA** | *Total_pollen_consumption ~ concentration*pollen_identity* | | | |
| --- | --- | --- | --- | --- |
|  | | numDF | F-value | p-value |
|  | concentration | 2 | 1.631 | 0.213 |
| pollen_identity | 1 | 2.174 | 0.151 |
| concentration*pollen_identity | 2 | 4.895 | **0.014** |
| **Comparisons** | *model, pairwise ~ concentration*pollen_identity* | | | |
|  | ***B-D* series** | t-ratio | | p-value |
|  | 0 mg/l - 1.25 mg/l | 3.257 | | **0.008** |
|  | 0 mg/l- 2.5 mg/l | 2.652 | | **0.033** |
|  | 1.25 mg/l - 2.5 mg/l | -0.605 | | 0.818 |
|  | ***S-D* series** |  | |  |
|  | 0 mg/l - 1.25 mg/l | -0.749 | | 0.736 |
|  | 0 mg/l - 2.5 mg/l | -0.979 | | 0.595 |
|  | 1.25 mg/l - 2.5 mg/l | -0.230 | | 0.971 |

**
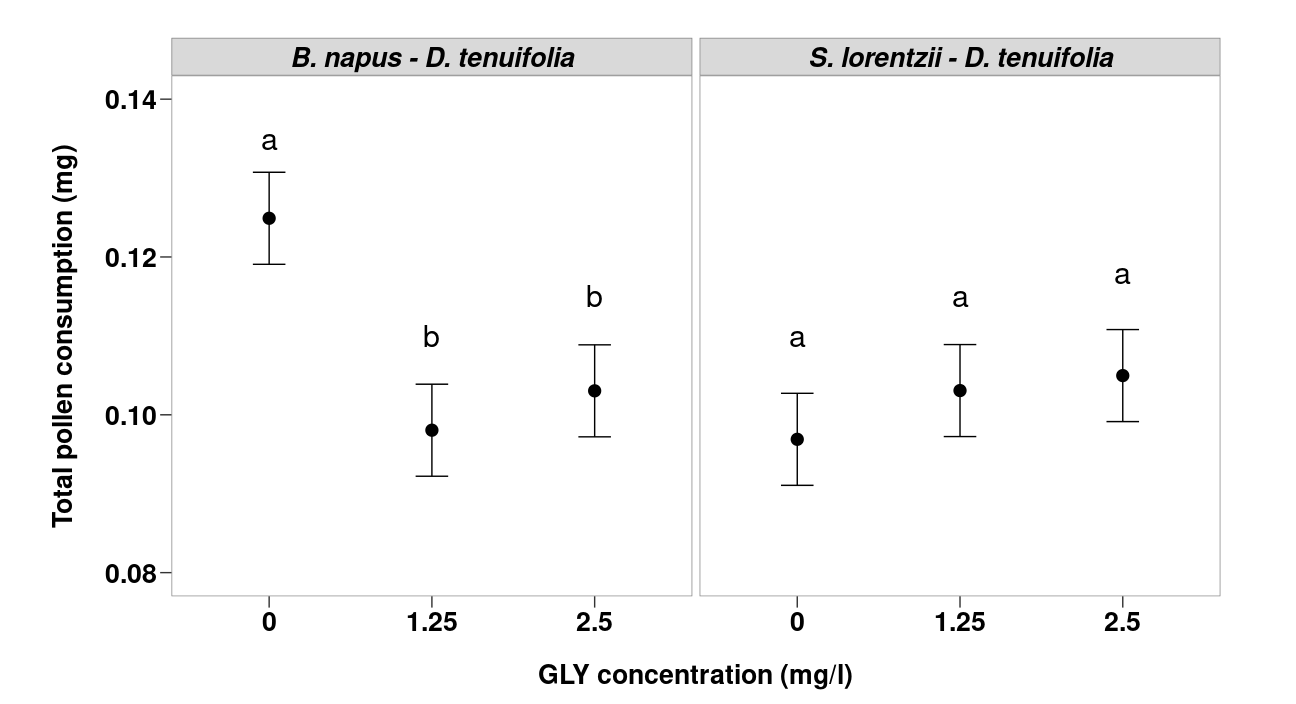
**

**Figure S2. Effects of GLY-contaminated pollen on the total pollen consumption of young worker bees.** Total pollen consumption is shown as a function of the GLY concentrations (in mg/l) according to the pollen identity (*B. napus* and *D. tenuifolia* in *B-D* series and *S. lorentzii* and *D. tenuifolia* pollens in the *S-D* series). Circles indicate mean value, bars show the 95% confidence intervals of the data predicted by the general linear model. Different letters indicate significant differences (P<0.05).

**Total pollen consumption in the IMI experiment**

**Table S4B. Statistical analysis of total pollen consumption in the IMI experiment.** Analysis of variance and *Post hoc* comparisons among concentration for the general linear model proposed for testing the effect of IMI compound on young bees' total pollen consumption.

| **ANOVA** | *Total_pollen_consumption ~ concentration*pollen_identity* | | | |
| --- | --- | --- | --- | --- |
|  | | numDF | F-value | p-value |
|  | concentration | 2 | 1.088 | 0.351 |
| pollen_identity | 1 | 3.314 | 0.079 |
| concentration*pollen_identity | 2 | 0.941 | 0.402 |
| **Comparisons** | *model, pairwise ~ concentration*pollen_identity* | | | |
|  | ***B-D* series** | t-ratio | | p-value |
|  | 0 µg/l - 1 µg/l | -0.479 | | 0.882 |
|  | 0 µg/l - 10 µg/l | -0.163 | | 0.985 |
|  | 1 µg/l - 10 µg/l | -0.310 | | 0.949 |
|  | ***S-D* series** |  | |  |
|  | 0 µg/l - 1 µg/l | -0.541 | | 0.852 |
|  | 0 µg/l - 10 µg/l | 1.302 | | 0.406 |
|  | 1 µg/l - 10 µg/l | -1.987 | | 0.134 |
